# Supplementary material
Source: PubMed Central journal article supplement (PMC1398068)
Supplement: eukcell_5_3_457__1.pdf [file eukcell_5_3_457__1.pdf]

TABLE S1. Phosphoproteins of *Chlamydomonas reinhardtii* of known and putative function

| No.                                                                            | Phosphopeptide sequence                                                           | Theor. mass [MH+]  | z      | Xcorr        | Gene model (JGI, vs2) / EST / cp | Function and/or homologies of depicted proteins to proteins of other organisms including their conserved domains along with their NCBI numbers                                                                                                                                                                                                 |
|--------------------------------------------------------------------------------|-----------------------------------------------------------------------------------|--------------------|--------|--------------|----------------------------------|------------------------------------------------------------------------------------------------------------------------------------------------------------------------------------------------------------------------------------------------------------------------------------------------------------------------------------------------|
| <b>A. Partially or fully characterized proteins from <i>C. reinhardtii</i></b> |                                                                                   |                    |        |              |                                  |                                                                                                                                                                                                                                                                                                                                                |
| 1                                                                              | <b>FPTPPGTpQK</b><br><b>FPTpPPGTpQK</b>                                           | 955,11<br>1035,09  | 2<br>2 | 2,04<br>2,10 | C_10030                          | gi 27542567 gb AAO16494.1  CP29-like protein [ <i>Chlamydomonas reinhardtii</i> ];<br>gi 60391855 sp Q93WD2 CB29_CHLRE chlorophyll a-b binding protein CP29;<br>gi 15430568 dbj BAB64419.1  light-harvesting chlorophyll-a/b binding protein Lhcb4 [ <i>C. reinhardtii</i> ];<br>u.a.: minor chlorophyll a-b binding protein of photosystem II |
| 2                                                                              | SSpPAPAQAAPQTGAPQGPpR n                                                           | 2064,14            | 3      | 2,84         | C_20130                          | gi 62860034 ref NP_001016608.1  hypothetical protein LOC549362 [ <i>Xenopus tropicalis</i> ], u.a.: novel protein (WD-repeat domain), found in centriole proteome and described as prototcilia-class FABP protein in human centrosome                                                                                                          |
| 3                                                                              | MSILKNAGARAGSTTpSpSLGSpVTVPASGLDTR n<br><b>PLGEMEVSpSpIAARGMIVTSAPSpYTpSYpK n</b> | 3247,31<br>3050,33 | 3<br>3 | 2,51<br>2,92 | C_20170                          | gi 23128981 ref ZP_00110817.1  COG2319: FOG: WD40 repeat [ <i>Nostoc punctiforme</i> PCC 73102], located in flagella                                                                                                                                                                                                                           |

|    |                                            |         |   |      |         |                                                                                                                                                                                                                                |
|----|--------------------------------------------|---------|---|------|---------|--------------------------------------------------------------------------------------------------------------------------------------------------------------------------------------------------------------------------------|
| 4  | <b>RLTGKHETpSSpMSDFSWGVANR n</b>           | 2429,57 | 3 | 3,24 | C_20337 | gi 1353876 gb AAB01817.1  glutamine synthetase [Chlamydomonas reinhardtii]; u.a.: GS1, cytosolic glutamine synthetase, CO2-responsive gene, located in the flagella, identified as thioredoxin target in <i>C. reinhardtii</i> |
| 5  | <b>ASCAGTpACVNSFGDEQLAVDMVADKLLFEALK n</b> | 3398,77 | 3 | 5,00 | C_30202 | gi 515618 emb CAA52439.1  sedoheptulose-bisphosphatase [Chlamydomonas reinhardtii], identified as thioredoxin target in <i>C. reinhardtii</i>                                                                                  |
| 6  | <b>LLAGVAGSAATALETpAVIGSAYGMPVCECR</b>     | 2865,36 | 3 | 2,90 | C_30272 | gi 66775516 gb AAY56333.1  hydroxyproline-rich glycoprotein GAS30 precursor [Chlamydomonas reinhardtii]                                                                                                                        |
| 7  | VISLLSESEVGTYYVQPPTpDTpLATpLFK             | 3050,13 | 3 | 3,26 | C_50072 | gi 23128003 ref ZP_00109860.1  COG2453: predicted protein-tyrosine phosphatase [Nostoc punctiforme PCC73102]; KOG: protein tyrosine phosphatase (CDC14), located in flagella                                                   |
| 8  | <b>LASSpGSVPNSpPVR n</b>                   | 1235,41 | 2 | 2,09 | C_50129 | gi 12620209 gb AAG60619.1  adenylate cyclase [Cryptococcus neoformans var. grubii]; gnl CDD 37 smart00044, CYCc, adenyl- / guanylyl cyclase, catalytic domain, located in flagella                                             |
| 9  | <b>PAGTpLTpLGVTpLGRSNSMTAPCSGASTPR</b>     | 2945,01 | 3 | 2,94 | C_60100 | gi 23479871 gb EAA16587.1  R27-2 protein [Plasmodium yoelii yoelii]; gnl CDD 10914 COG1196, Smc, chromosome segregation ATPases, located in flagella                                                                           |
| 10 | LVSGVSpLKELHSVATSENKGE                     | 2435,61 | 3 | 2,90 | C_80065 | gi 54649966 dbj BAD67134.1  Lhc-like protein Lh1 [Chlamydomonas reinhardtii]                                                                                                                                                   |

|    |                                                               |         |   |      |          |                                                                                                                                                                                                                                                                                                                                                                                |
|----|---------------------------------------------------------------|---------|---|------|----------|--------------------------------------------------------------------------------------------------------------------------------------------------------------------------------------------------------------------------------------------------------------------------------------------------------------------------------------------------------------------------------|
| 11 | <b>CGAGTpNSpLYGLRGQQLSpWQSpNIATGPTAAYpYTY<br/>TpiSpGFDK n</b> | 4431,59 | 3 | 3,11 | C_90101  | gi 21039486 gb AAM33652.1  mastigoneme-like protein [Chlamydomonas reinhardtii]; KOG: fibrillins and related proteins containing Ca <sup>2+</sup> -binding EGF-like domains, located in flagella                                                                                                                                                                               |
| 12 | ASpGGRGGSpGSDVEEAGAGGDEQQGSpQSpKR n                           | 3042,62 | 3 | 2,90 | C_110095 | No significant similarity found; u.a.: coiled coil protein, located in flagella                                                                                                                                                                                                                                                                                                |
| 13 | AAWKAPPLKATpSGTLYpK                                           | 1964,09 | 2 | 2,35 | C_120103 | gi 24030434 gb AAN41372.1  dihydroxy-acid dehydratase [Arabidopsis thaliana]; CDD 25654 pfam00920, ILVD_EDD, dehydratase family, identified as thioredoxin target in C. reinhardtii                                                                                                                                                                                            |
| 14 | QELESLRSSpSpPAPASSAPAPAR n                                    | 2370,35 | 3 | 4,08 | C_150094 | gi 15011441 gb AAK77552.1  LCI5 [Chlamydomonas reinhardtii]; u.a.: Lci5, low CO <sub>2</sub> inducible                                                                                                                                                                                                                                                                         |
| 15 | DYpKERLVSpSpEGTQTpVFMPQSpGYTIR                                | 3294,11 | 3 | 2,61 | C_150121 | gi 50906913 ref XP_464945.1  putative PKG-Ib [Oryza sativa (japonica cultivar-group)]; gn CDD 17776 cd00180, S_TKc, serine/threonine protein kinases, catalytic domain; gn CDD 16536 cd00143, PP2Cc, serine/threonine phosphatases, family 2C, catalytic domain; gn CDD 14778 cd00038, CAP_ED, effector domain of the CAP family of transcription factors, located in flagella |
| 16 | <b>TVLPANWRDSpLDEDEPAKPAAGR</b>                               | 2491,72 | 3 | 4,41 | C_150160 | gi 34398358 gb AAO22241.1  41 kDa ribosome-associated protein precursor [Chlamydomonas reinhardtii]; u.a.: chloroplast RNA-binding protein, chloroplast ribosome-associated RAP41 stem-loop-binding protein, found in chloroplast 70 S ribosome proteome                                                                                                                       |

|    |                                                        |                    |        |              |          |                                                                                                                                                                                                                                                                                                                                                                          |
|----|--------------------------------------------------------|--------------------|--------|--------------|----------|--------------------------------------------------------------------------------------------------------------------------------------------------------------------------------------------------------------------------------------------------------------------------------------------------------------------------------------------------------------------------|
| 17 | <b>VDSpSpSpLAATpLDNLAQLAQGVTDWQAR</b>                  | 3051,88            | 3      | 2,60         | C_180152 | gi 14334122 gb AAK60544.1  hydroxyproline rich glycoprotein Vsp6 [Chlamydomonas reinhardtii]; c.d.: Kringle domain                                                                                                                                                                                                                                                       |
| 18 | AAVADATGAASpSAAADTpR<br><b>TSpSpSGGTAGAALTAPSAPR n</b> | 1737,60<br>1722,75 | 3<br>2 | 2,52<br>2,65 | C_200025 | No significant similarity found; c.d: coiled coil protein, found in centriole proteome                                                                                                                                                                                                                                                                                   |
| 19 | ELQELVEMEVRELLSFYpK                                    | 2336,58            | 3      | 2,99         | C_200083 | gi 39936346 ref NP_948622.1  elongation factor Tu [Rhodospseudomonas palustris CGA009]; u.a.: EEF1, putative mitochondrial translation factor Tu; gnl CDD 9925 COG0050, TufB, GTPases - translation elongation factors, identified as thioredoxin target in C. reinhardtii                                                                                               |
| 20 | <b>NETAPATpGDAGLDGVAVDELPAALR</b>                      | 2406,61            | 2      | 2,16         | C_200196 | gi 70879596 gb EAN92756.1  hypothetical protein, conserved [Trypanosoma cruzi]; u.a.: coiled coil protein with homology to a putative transcript CG15792-PC, isoform C [Drosophila melanogaster], a hypothetical protein CE2713 [Corynebacterium efficiens YS-314] and to ciliary rootlet coiled-coil, rootletin NP_055490.2 [Homo sapiens], found in centriole proteome |
| 21 | DFDVGRTVSASVQIINRSYpK n                                | 2336,48            | 3      | 3,08         | C_270111 | gi 62650163 ref XP_575971.1  similar to hypothetical protein A530045M11 [Rattus norvegicus]; u.a.: FAP74, located in flagella                                                                                                                                                                                                                                            |

|    |                                                                                                     |                               |             |                      |          |                                                                                                                                                                                                                                                                                                                                                    |
|----|-----------------------------------------------------------------------------------------------------|-------------------------------|-------------|----------------------|----------|----------------------------------------------------------------------------------------------------------------------------------------------------------------------------------------------------------------------------------------------------------------------------------------------------------------------------------------------------|
| 22 | <b>PGTSGAGAGGGGGKPA</b> <i>SpPQRGGSSpGGLAASpSAT</i><br><b>pTPR n</b>                                | 3052,17                       | 3           | 3,34                 | C_290071 | gi 68353830 ref XP_690098.1  similar to cold autoinflammatory syndrome 1 protein (cryopyrin) (NACHT-, LRR- and PYD-containing protein 3) (PYRIN-containing APAF1-like protein 1) (Angiotensin/vasopressin receptor AII/AVP-like) [Danio rerio]; c.d.: leucine-rich repeats (LRRs), ribonuclease inhibitor (RI)-like subfamily, located in flagella |
| 23 | RLSpDDEEDELRL                                                                                       | 1685,62                       | 2           | 3,81                 | C_320111 | gi 40714511 dbj BAD06919.1  light-harvesting chlorophyll-a/b protein of photosystem I (Type III) [Chlamydomonas reinhardtii]                                                                                                                                                                                                                       |
| 24 | <b>IIEVLSA</b> <i>SpEGNILEDETPAINVISpSSpK</i>                                                       | 2759,00                       | 3           | 2,66                 | C_360006 | gi 27529748 dbj BAA76788.2  KIAA0944 protein [Homo sapiens]; u.a.: DHC6, dynein heavy chain 6 (putative flagellar inner arm dynein heavy chain), located in flagella                                                                                                                                                                               |
| 25 | IDVDYpRLVPPGSpAFGTpRFSFEPPAGR n<br><b>VLTPCHIPHLDASpCEPFAR</b><br><b>YpAVTPARGIHFGPVTpYNTASpK n</b> | 3093,12<br>2072,31<br>2491,47 | 3<br>2<br>3 | 3,03<br>3,16<br>2,62 | C_410060 | gi 57087161 ref XP_536793.1  similar to hydrocephalus-inducing protein [Canis familiaris]; u.a.: similar to mouse hydrocephaly protein hydin HY3, located in flagella                                                                                                                                                                              |
| 26 | VSpPVPPGTpQLPIEMSpINGVPAVAACPQK n                                                                   | 3042,25                       | 3           | 3,03                 | C_420012 | gi 29135339 ref NP_619615.2  polycystic kidney and hepatic disease 1-like 1 [Mus musculus]; u.a.: PKHD1-1, similar to the polycystic kidney and hepatic disease gene product fibrocystin, located in flagella                                                                                                                                      |
| 27 | LTVDASVRQSSpAR n                                                                                    | 1470,51                       | 2           | 2,17                 | C_550085 | No significant similarity found; u.a.: FAP1, located in flagella                                                                                                                                                                                                                                                                                   |

|    |                                                          |                    |        |              |          |                                                                                                                                                                                                                                                                                      |
|----|----------------------------------------------------------|--------------------|--------|--------------|----------|--------------------------------------------------------------------------------------------------------------------------------------------------------------------------------------------------------------------------------------------------------------------------------------|
| 28 | WMTYSpMQEK n                                             | 1284,38            | 2      | 2,51         | C_570035 | gi 50057451 emb CAH03435.1  hypothetical transmembrane protein [Paramecium tetraurelia]; u.a.: FAP113, located in flagella                                                                                                                                                           |
| 29 | LAGAERTpINVQDERIALLSQR                                   | 2434,63            | 3      | 3,20         | C_590094 | No significant similarity found; u.a.: located in flagella                                                                                                                                                                                                                           |
| 30 | <b><i>TpATpYpQSpIITLpQALALWKR n</i></b>                  | 2383,49            | 3      | 3,44         | C_590099 | gi 68371158 ref XP_695404.1  similar to SI:PACKTRZ.2 (novel protein similar to human polycystic kidney disease 2-like 1 (PKD2L1)), partial [Danio rerio]; u.a.: PKD2, weakly similar to polycystin-2 KOG: Ca2+-modulated nonselective cation channel polycystin, located in flagella |
| 31 | CIRCHTpEAGIVEMTPALRGKLLDEVTPN<br><b>LDDEFMDYpEIDEYpK</b> | 3131,43<br>1985,89 | 3<br>2 | 2,93<br>2,07 | C_700061 | gi 67475672 ref XP_653525.1  plasma membrane calcium-transporting ATPase, putative [Entamoeba histolytica HM-1:IMSS], u.a.: related to plant potential calcium-transporting ATPase 9, plasma membrane-type Ca(2+)-ATPase isoform; located in flagella                                |
| 32 | <b>VLVHIEEQSPDIGQGVHGMGTpK</b>                           | 2314,62            | 3      | 6,24         | C_750005 | gi 10441431 gb AAG17036.1  S-adenosylmethionine synthetase [Pinus contorta]; u.a.: located in flagella, identified as thioredoxin target in <i>C. reinhardtii</i>                                                                                                                    |
| 33 | <b><i>TpAGPPPGTAPAHPPPGGSpYHLVTPDGSR</i></b>             | 2737,77            | 3      | 2,73         | C_750038 | gi 71755035 ref XP_828432.1  hypothetical protein Tb11.02.0990 [Trypanosoma brucei]; u.a.: FAP75, flagellar associated P-loop containing protein, located in flagella                                                                                                                |

|    |                                                                                                                                        |                                          |                  |                              |           |                                                                                                                                                                                   |
|----|----------------------------------------------------------------------------------------------------------------------------------------|------------------------------------------|------------------|------------------------------|-----------|-----------------------------------------------------------------------------------------------------------------------------------------------------------------------------------|
| 34 | <b>PFSpAGPSpGPGAGAGGAGGTpRSR</b>                                                                                                       | 2112,92                                  | 3                | 3,21                         | C_760066  | No significant similarity found; u.a.: located in flagella                                                                                                                        |
| 35 | APDPCSLDspWLRsALPEAApPAASpSSER                                                                                                         | 3043,10                                  | 3                | 2,77                         | C_850039  | No significant similarity found; u.a.: located in flagella                                                                                                                        |
| 36 | <b>RSpSpISpTpATpAAINTPADLISSpPPVTpSFR n</b>                                                                                            | 2947,14                                  | 3                | 2,68                         | C_870044  | No significant similarity found; u.a.: located in flagella                                                                                                                        |
| 37 | <b>GLGLGGSpVNGGSpAASpAAAAAAATpSpVTpTDA<br/>ASpMTpR n</b>                                                                               | 3314,23                                  | 3                | 3,49                         | C_910056  | gi 29827935 ref NP_822569.1  putative ABC transporter solute-binding protein [Streptomyces avermitilis MA-4680]; located in flagella                                              |
| 38 | LPGAQSpGGVENLKPLFKLYpGGK                                                                                                               | 2434,61                                  | 3                | 3,36                         | C_970003  | gi 50750584 ref XP_422048.1  similar to tubulin alpha-5 chain - chicken [Gallus gallus]; u.a.: located in flagella (FAP248)                                                       |
| 39 | <b>VAVAPAAPARSpASpVR</b>                                                                                                               | 1485,63                                  | 2                | 2,36                         | C_1120028 | gi 16974385 gb AAL31118.1  AT5g19940/F28116_90 [Arabidopsis thaliana]; gnl CDD 16052 pfam04755 PAP_fibrillin; u.a.: located in flagella, found in centriole proteome as "unknown" |
| 40 | ELSQAQVVVAQATKECNELLEVISpTpNTpVDVETK<br><b>FYFISDDELLSpILGTSpDPTSpVQEHMLK</b><br>IEAEVLSVVSSQIKNIQEALKNDLTpR n<br><b>SpKGAIQKQVMNK</b> | 3830,94<br>3033,45<br>2979,27<br>1412,58 | 3<br>3<br>3<br>2 | 2,51<br>2,85<br>3,15<br>2,30 | C_1150005 | gi 7441384 pir  T08164 dynein alpha heavy chain [Chlamydomonas reinhardtii]; u.a.: DHC1, flagellar inner arm dynein 1 heavy chain alpha, located in flagella                      |
| 41 | <b>FDLNTpLASpTpKEKEAKK</b>                                                                                                             | 1966,03                                  | 2                | 3,12                         | C_1340006 | gi 18164 emb CAA32061.1  OEE3 precursor protein [Chlamydomonas reinhardtii]; u.a.: oxygen evolving enhancer protein 3 (PsbQ), located in flagella                                 |

|    |                                                       |                    |        |              |                       |                                                                                                                                                                                                                          |
|----|-------------------------------------------------------|--------------------|--------|--------------|-----------------------|--------------------------------------------------------------------------------------------------------------------------------------------------------------------------------------------------------------------------|
| 42 | <b>LAANTAAALGGANPEQTLAKISpSpKR n</b>                  | 2516,75            | 3      | 3,55         | C_1350034             | gi 11967769 emb CAC19368.1  putative plasma membrane hydrogen ATPase [Chlamydomonas reinhardtii]; u.a.: PMH1; gi:11967769; gnl CDD 10347 COG0474, MgtA, cation transport ATPase [Inorganic ion transport and metabolism] |
| 43 | FVGTGYpFDLVSTVITQGTSpSpTNALK n                        | 2847,84            | 3      | 3,42         | C_1460023             | gi 619932 gb AAB61446.1  isocitrate lyase; u.a.: located in flagella; identified as thioredoxin target in <i>C. reinhardtii</i>                                                                                          |
| 44 | <b>LGADSpGALEFVPK</b>                                 | 1286,47            | 2      | 4,51         | C_1580045             | gi 130264 sp P18068 PLAS_CHLRE plastocyanin, chloroplast precursor (PC6-2); gnl CDD 15127 pfam00127, copper binding proteins, plastocyanin/azurin family; u.a.: located in flagella                                      |
| 45 | <b>PTpAGSpIIALGDAKSVKVGGTpHVHAHTpYpTR n</b>           | 3052,27            | 3      | 3,86         | C_1600004             | gi 50660327 gb AAT80888.1  chloroplast chaperonin 21 [Vitis vinifera], identified as thioredoxin target in <i>C. reinhardtii</i>                                                                                         |
| 46 | FNAETTANKTITFSSpLTTpGIFQMSIEGAVEK n                   | 3515,83            | 3      | 2,81         | C_1710010             | gi 2494209 sp Q39575 DYHG_CHLRE dynein gamma chain, flagellar outer arm; u.a.: ODA2, located in flagella                                                                                                                 |
| 47 | <b>LTDELETpQKLNLR</b><br>TIMENEQMSIELSYpQSRQTEKLLNK n | 1653,75<br>3095,39 | 2<br>3 | 2,30<br>2,69 | C_2350009             | No significant similarity found; u.a.: FAP157, located in flagella                                                                                                                                                       |
| 48 | SpLLHTpLPTpNLNYpNLK<br>TpLDGKILFLTKSpEGTLIFTADPNFNK   | 2061,93<br>3045,26 | 2<br>3 | 2,07<br>2,63 | Chloroplast<br>Genome | putative_rpoC2; gi[41179047] RNA polymerase beta' subunit [Chlamydomonas reinhardtii]                                                                                                                                    |



**B: Proteins that show significant homology to proteins of other organisms or contain conserved domains**

|    |                                                                  |                    |        |              |         |                                                                                                                                                                              |
|----|------------------------------------------------------------------|--------------------|--------|--------------|---------|------------------------------------------------------------------------------------------------------------------------------------------------------------------------------|
| 49 | VRVQLFGSp LRQEVAWFDDADHSSGK                                      | 3042,25            | 3      | 3,08         | C_10157 | gi 27368855 emb CAD59585.1  MDR-like (multi drug resistance) ABC transporter [Oryza sativa (japonica cultivar-group)]                                                        |
| 50 | NGTTTAGNSpSpQVTDGAAVALMMTRAEATR n                                | 3044,12            | 3      | 3,07         | C_10176 | gi 393707 emb CAA47926.1  3-ketoacyl-CoA thiolase; acetyl-CoA acyltransferase [Cucumis sativus]; gnl CDD 27979 cd00751, thiolase                                             |
| 51 | WTpYEACIFKHAVQR                                                  | 1833,00            | 2      | 2,41         | C_10342 | gi 49257646 gb AAH74301.1  gene info MGC84105 protein [Xenopus laevis]; KOG: protein kinase C substrate, 80 KD protein, heavy chain                                          |
| 52 | <b>KAAGGHNVGYESpDDSpNAGQLPDGAGGEVGGEVVE SAK n</b>                | 3649,66            | 3      | 6,98         | C_10354 | gi 23198376 gb AAN15715.1  RNA recognition motif (RRM)-containing protein [Arabidopsis thaliana]; gnl CDD 25351 smart00715, LA, domain in the RNA binding Lupus La protein   |
| 53 | ATpADQVLSpSPWLGR n<br>PENFMLSspAPTpQQQKVEAEAASpAAAGGDGGLALGIGA R | 1661,63<br>3825,89 | 2<br>3 | 2,08<br>2,52 | C_20233 | gi 4510380 gb AAD21468.1  putative calcium-dependent protein kinase [Arabidopsis thaliana]; gnl CDD 17776 cd00180, S_TKc, serine/threonine protein kinases, catalytic domain |
| 54 | QVEFYpFSDANLPTpDKK                                               | 2063,04            | 2      | 2,74         | C_20239 | gi 57899257 dbj BAD87502.1  putative RNA-binding protein homolog [Oryza sativa (japonica cultivar-group)]                                                                    |

|    |                                                                        |                    |   |              |         |                                                                                                                                                                                                                     |
|----|------------------------------------------------------------------------|--------------------|---|--------------|---------|---------------------------------------------------------------------------------------------------------------------------------------------------------------------------------------------------------------------|
| 55 | DIALTpGAYpVAMLNAICSTSQSLLADSPR n                                       | 3043,25            | 3 | 3,15         | C_20259 | gi 1183864 emb CAA63061.1  squamosa [gene involved in determination of floral meristem] - promoter binding protein 2 [Antirrhinum majus]; u.a.: SBP domain containing                                               |
| 56 | LGPLAAEAEQLRSpQVAILEARVGTpLTR n                                        | 3024,25            | 3 | 3,14         | C_20381 | gi 53761781 ref ZP_00350820.1  COG1463: ABC-type transport system involved in resistance to organic solvents, periplasmic component [Ralstonia eutropha JMP134]                                                     |
| 57 | AASTQAFSKVGASpNDDGLDGGGGEEAEATR<br>PLQVTpGAVLELPSpAGEGSAHSVFAPASPPTpRR | 3079,00<br>3498,57 | 3 | 2,54<br>3,05 | C_30102 | gi 29824376 gb AAP04148.1  unknown protein [Arabidopsis thaliana]; c.d.: RNA-binding region RNP-1 (RNA recognition motif)                                                                                           |
| 58 | <b>MAADGGSpTpSTpTpHTpLSpANQELRLECPSpGK</b>                             | 3032,06            | 3 | 2,91         | C_30169 | gi 50906345 ref XP_464661.1  putative ATP/GTP-binding protein [Oryza sativa (japonica cultivar-group)]; u.a.: similar to mRNA cleavage and polyadenylation factor complex II subunit CLP1 [Homo sapiens]            |
| 59 | GAAAGSTpSpSpAGGQAPLPAPLVPLSSpR n<br><b>LTpLLLGPSPCGKSSFMRALTGR</b>     | 2641,50<br>2386,76 | 3 | 2,92<br>2,10 | C_40065 | gi 41052472 dbj BAD07483.1  PDR-type (pleiotropic drug resistance) ABC (ATP binding cassette) transporter 1 [Nicotiana tabacum]; gnl CDD 10851 COG1131, CcmA, ABC-type multidrug transport system, ATPase component |
| 60 | HAVWYLDDSpVICQRRLDEHVSphVR n                                           | 3095,23            | 3 | 2,97         | C_40179 | gi 4235644 gb AAD13304.1  polyprotein [Lycopersicon esculentum]; gnl CDD 25582 pfam00665, rve, integrase core domain; gnl CDD 14766 cd00024, CHROMO, chromatin organization modifier                                |

|    |                                              |         |   |      |         |                                                                                                                                                                                                                                                                                                                                                                               |
|----|----------------------------------------------|---------|---|------|---------|-------------------------------------------------------------------------------------------------------------------------------------------------------------------------------------------------------------------------------------------------------------------------------------------------------------------------------------------------------------------------------|
| 61 | <b>PVSpDRAAAVLVGLFEDSTGVVRVLLTQR</b>         | 3050,40 | 3 | 2,89 | C_50125 | gi 50945105 ref XP_482080.1  putative phosphohydrolase [ <i>Oryza sativa</i> (japonica cultivar-group)]                                                                                                                                                                                                                                                                       |
| 62 | VKPFPLNNTLLRQLCASpALVAR                      | 2505,91 | 3 | 2,79 | C_50131 | gi 67480485 ref XP_655592.1  protein kinase, putative [ <i>Entamoeba histolytica</i> HM-1:IMSS]                                                                                                                                                                                                                                                                               |
| 63 | <b>GVVETYPHVTSYEMSATDVVSpQDWALGSpGVVEK n</b> | 3489,74 | 3 | 2,71 | C_70067 | gi 30680365 ref NP_566313.2  membrane protein, putative [ <i>Arabidopsis thaliana</i> ]; gnl CDD 24323 smart00665, B561, cytochrome b-561 / ferric reductase transmembrane domain; gnl CDD 15053 smart00664, DoH, possible catecholamine-binding domain                                                                                                                       |
| 64 | GRGLSpYpDGENGPAALSpSpPPSpQPSPDVR n           | 3041,69 | 3 | 2,69 | C_70174 | gi 68383231 ref XP_683663.1  similar to natriuretic peptide receptor-A [ <i>Danio rerio</i> ]; c.d.: adenylyl- / guanylyl cyclase, catalytic domain                                                                                                                                                                                                                           |
| 65 | <b>LTpSpGAAARPVLTpVLLLLAAGALMASGSQR</b>      | 3050,29 | 3 | 2,99 | C_80024 | gi 18419973 ref NP_568378.1  outer membrane OMP85 family protein [ <i>Arabidopsis thaliana</i> ]; u.a.: hypothetical conserved protein similar to OEP80 (At5g19620) and related proteins from plants and cyanobacteria; annotation refers to N-terminal exons only; conserved ATP/GTP-binding site motif A (P-loop); gnl CDD 25688 pfam01103, Bac_surface_Ag, Surface antigen |
| 66 | NFVTTLVTPQMEKSGRGGR                          | 2062,23 | 3 | 2,52 | C_80107 | gi 20259956 gb AAM13325.1  putative protein [ <i>Arabidopsis thaliana</i> ]; KOG: predicted membrane protein                                                                                                                                                                                                                                                                  |

|    |                                           |                    |        |              |          |                                                                                                                                                                                                       |
|----|-------------------------------------------|--------------------|--------|--------------|----------|-------------------------------------------------------------------------------------------------------------------------------------------------------------------------------------------------------|
| 67 | SpGAMFAKDDLDWKWYpNK                       | 2236,28            | 3      | 2,66         | C_80131  | gi 67539162 ref XP_663355.1  hypothetical protein AN5751.2 [Aspergillus nidulans FGSC A4]; gnl CDD 10116 COG0241, HisB, histidinol phosphatase and related phosphatases                               |
| 68 | KYpVAELFPLLTLIRADYAPADVHR                 | 2981,33            | 3      | 2,86         | C_80228  | gi 15217579 ref NP_171698.1  guanine nucleotide exchange family protein [Arabidopsis thaliana]; gnl CDD 14836 cd00171, Sec7 domain                                                                    |
| 69 | <b>GSLDRAGGGAGGAGSpGAGGMYAGEVSR</b>       | 2406,43            | 2      | 2,25         | C_90133  | gi 50898810 ref XP_450193.1  putative serine/threonine-protein kinase ctr1 [Oryza sativa (japonica cultivar-group)]; gnl CDD 17776 cd00180, S_TKc, serine/threonine protein kinases, catalytic domain |
| 70 | <b>FFDSpADWAMNK</b><br><b>RVSpHLDPLDK</b> | 1314,47<br>1162,34 | 2<br>3 | 3,79<br>3,41 | C_90179  | gi 22136292 gb AAM91224.1  unknown protein [Arabidopsis thaliana]; KOG: regulator of ATP-sensitive K <sup>+</sup> channels alpha-endosulfine/ARPP-19 and related cAMP-regulated phosphoproteins       |
| 71 | <b>ALVRDVSpKATpSpGSpGLLAGVGSptTEVVR</b>   | 3031,87            | 3      | 2,82         | C_100060 | gi 45508602 ref ZP_00160940.1  COG0702: predicted nucleoside-diphosphate-sugar epimerases [Anabaena variabilis ATCC 29413]                                                                            |
| 72 | <b>LGSpGSpHGMRSpGPARALIAAGIFGFESK</b>     | 2946,14            | 3      | 2,72         | C_100098 | gi 29609969 dbj BAC74017.1  putative ABC transporter solute-binding protein [Streptomyces avermitilis MA-4680]                                                                                        |
| 73 | <b>DARVLYVSATpGATpESENLCYMER</b>          | 2641,83            | 3      | 3,80         | C_100154 | gi 54645696 gb EAL34434.1  GA17476-PA [Drosophila pseudoobscura]; KOG: nuclear helicase MOP-3/SNO (DEAD-box superfamily)                                                                              |

|    |                                              |         |   |      |          |                                                                                                                                                                                                                                                                                                                                         |
|----|----------------------------------------------|---------|---|------|----------|-----------------------------------------------------------------------------------------------------------------------------------------------------------------------------------------------------------------------------------------------------------------------------------------------------------------------------------------|
| 74 | SpASpGDAGSpRMAVVTpFAKGGK                     | 2218,05 | 2 | 2,14 | C_110077 | gi 4689034 emb CAB41419.1  chloroplast ribosome recycling factor protein [ <i>Spinacia oleracea</i> ]; gnl CDD 24166 cd00520, RRF, ribosome recycling factor (RRF)                                                                                                                                                                      |
| 75 | <b>TSpENRITVTEPLTAASpVAARQK n</b>            | 2406,59 | 2 | 2,26 | C_110167 | gi 17104663 gb AAL34220.1  unknown protein [ <i>Arabidopsis thaliana</i> ]; gnl CDD 10501 COG0631, PTC1, serine/threonine protein phosphatase                                                                                                                                                                                           |
| 76 | PSpQIWAYpNVTSGDVLWKMNAREGYMSPDNDGDNR         | 4049,16 | 3 | 2,86 | C_110171 | gi 76257967 ref ZP_00765624.1  protein kinase: pyrrolo-quinoline quinone [ <i>Chloroflexus aurantiacus</i> ]; gnl CDD 5324 cd00216, PQQ_DH, dehydrogenases with pyrrolo-quinoline quinone (PQQ) as cofactor, like ethanol, methanol, and membrane bound glucose dehydrogenases. The alignment model contains an 8-bladed beta-propeller |
| 77 | DLDWTNVPFPQYpYpSR                            | 2062,02 | 3 | 2,77 | C_110176 | gi 42572713 ref NP_974452.1  exostosin family protein [ <i>Arabidopsis thaliana</i> ]                                                                                                                                                                                                                                                   |
| 78 | <b>ASMSpFTpAGTpSGSpGLAGPHGPSpPLSNSSAGR n</b> | 3049,86 | 3 | 3,25 | C_110227 | gi 3122300 sp Q00771 KCC1_EMENI calcium/calmodulin-dependent protein kinase (CMPK); gnl CDD 24220 smart00219, TyrKc, tyrosine kinase, catalytic domain                                                                                                                                                                                  |
| 79 | MLEEAAGRVS pDERLYDK n                        | 2063,17 | 2 | 2,93 | C_120100 | gi 8778961 gb AAD49766.2  contains similarity to HARP gene [ <i>Homo sapiens</i> ]; gnl CDD 7500 pfam00176, SNF2_N, SNF2 family N-terminal domain; KOG: chromatin remodeling protein HARP/SMARCAL1, DEAD-box superfamily                                                                                                                |

|    |                                                    |         |   |      |          |                                                                                                                                                                                                                                                                                                 |
|----|----------------------------------------------------|---------|---|------|----------|-------------------------------------------------------------------------------------------------------------------------------------------------------------------------------------------------------------------------------------------------------------------------------------------------|
| 80 | <b><i>TpTSpQGFGSNTpASpGDEPGDALTpAVTpAILNTR</i></b> | 2944,09 | 3 | 3,03 | C_130052 | gi 72114805 ref XP_784044.1  similar to cyclin-dependent kinase-like 2 [Strongylocentrotus purpuratus]; KOG: mitogen-activated protein kinase; gnl CDD 17776 cd00180, S_TKc, serine/threonine protein kinases, catalytic domain; gnl CDD 5392 cd00192, TyrKc, tyrosine kinase, catalytic domain |
| 81 | QNTYGVDVTQGSptQDQSR n                              | 2065,00 | 3 | 3,03 | C_130173 | gi 72008408 ref XP_782686.1  similar to deleted in malignant brain tumors 1 isoform c precursor [Strongylocentrotus purpuratus]; gnl CDD 178 smart00202, SR, scavenger receptor Cys-rich                                                                                                        |
| 82 | <b><i>EGEGATPQPpGDTpVEVHWAGFTKGYQGK n</i></b>      | 2928,01 | 3 | 3,50 | C_140146 | gi 51968578 dbj BAD42981.1  unknown protein [Arabidopsis thaliana]; u.a.: FKB16-8, FKBP-type peptidyl-prolyl cis-trans isomerase (EC 5.2.1.8), probably targeted to the chloroplast lumen                                                                                                       |
| 83 | <b><i>SpSpSSpGGATpANTpTpTpSK n</i></b>             | 1329,34 | 2 | 2,14 | C_150118 | gi 55238385 gb EAA11047.2  gene info ENSANGP00000017775 [Anopheles gambiae str. PEST]; gnl CDD 456 smart00504, Ubox, modified RING finger domain, without the full complement of Zn <sup>2+</sup> -binding ligands, probable involvement in E2-dependent ubiquitination                         |
| 84 | SpKIPIICNDK                                        | 1427,65 | 2 | 2,45 | C_160032 | gi 30314655 dbj BAC76085.1  replication factor C 110 kDa subunit [Oryza sativa (japonica cultivar-group)]; c.d.: HolB, ATPase involved in DNA replication or repair, replication factor C large subunit                                                                                         |

|    |                                                                   |                    |        |              |          |                                                                                                                                                                                                                                                                                                     |
|----|-------------------------------------------------------------------|--------------------|--------|--------------|----------|-----------------------------------------------------------------------------------------------------------------------------------------------------------------------------------------------------------------------------------------------------------------------------------------------------|
| 85 | QKDWSKVESpELNELEQK                                                | 2171,24            | 3      | 2,84         | C_160132 | gi 62467587 gb AAX83943.1  Sgt1b [Capsicum annuum]; gnl CDD 14219 COG5091, SGT1, suppressor of G2 allele of skp1 and related proteins                                                                                                                                                               |
| 86 | <b>QGGAMGGAGVVVASpGPPGSVSPASpSLSR</b>                             | 2405,71            | 3      | 2,84         | C_170061 | gi 39584866 emb CAE64290.1  hypothetical protein CBG08960 [Caenorhabditis briggsae]; gnl CDD 25296 smart00220, S_TKc, serine/threonine protein kinases, catalytic domain                                                                                                                            |
| 87 | VYMFVDYpAGSSpVQSpVMERAGGGLGGAATK                                  | 3150,22            | 3      | 2,68         | C_180026 | gi 72114805 ref XP_784044.1  similar to cyclin-dependent kinase-like 2 [Strongylocentrotus purpuratus]; gnl CDD 17776 cd00180, S_TKc, serine/threonine protein kinases, catalytic domain                                                                                                            |
| 88 | RQYPGTHNAVQEPEHAPSpNGGYETSR n                                     | 2963,97            | 3      | 2,79         | C_190078 | gi 55637361 ref XP_522248.1  similar to hypothetical protein BC016153 [Pan troglodytes]; gnl CDD 17533 pfam04819, DUF716, family of unknown function                                                                                                                                                |
| 89 | LRDQLDDESpSpYVEDDAASGHPGALLSR n<br><b>RWPEDGINTpEDMVWLAEEANKR</b> | 3078,00<br>2642,90 | 3<br>3 | 3,39<br>8,04 | C_190173 | gi 75756302 gb ABA27197.1  morn repeat protein 1 [Bigeloviella natans]                                                                                                                                                                                                                              |
| 90 | <b>FSpPDSQMLAVASpR</b>                                            | 1373,59            | 2      | 2,42         | C_200004 | gi 21593320 gb AAM65269.1  unknown [Arabidopsis thaliana]; WD-40 repeat containing protein                                                                                                                                                                                                          |
| 91 | VDNASpLTGESEACER                                                  | 1661,63            | 2      | 2,44         | C_200014 | gi 12408294 ref NP_074039.1  Na <sup>+</sup> /K <sup>+</sup> -ATPase alpha 4 subunit [Rattus norvegicus]; u.a.: related to mammalian sodium/potassium-transporting ATPase alpha-1 chain precursor (sodium pump 1) (Na <sup>+</sup> /K <sup>+</sup> ATPase 1); gnl CDD 15125 pfam00122, E1-E2_ATPase |

|    |                                               |         |   |      |          |                                                                                                                                                                                                                                                                   |
|----|-----------------------------------------------|---------|---|------|----------|-------------------------------------------------------------------------------------------------------------------------------------------------------------------------------------------------------------------------------------------------------------------|
| 92 | <b>PHTpSGGGGSpSpGNSpGGTGAAQQLLR n</b>         | 2407,32 | 2 | 2,35 | C_200111 | gi 66856833 ref ZP_00400894.1  parallel beta-helix repeat [Anaeromyxobacter dehalogenans 2CP-C]                                                                                                                                                                   |
| 93 | <b>VAQSpRFLNNRLVEVVAFMENIAVK</b>              | 2829,21 | 3 | 2,52 | C_210046 | gi 56202035 dbj BAD73564.1  putative kinase-like protein splice variant 1 [Oryza sativa (japonica cultivar-group)]; gnl CDD 17776 cd00180, S_TKc, serine/threonine protein kinases                                                                                |
| 94 | MNSGPDTpAGRTpLHQCQQLLEEAR                     | 2603,62 | 3 | 2,74 | C_210167 | gi 57087513 ref XP_546906.1  similar to tyrosylprotein sulfotransferase 1 [Canis familiaris]; gnl CDD 25886 K+ channel tetramerisation domain; gnl CDD 25886 and gnl CDD 24221 smart00225, BTB, Broad-Complex, Tramtrack and Bric a brac, domain in Broad-Complex |
| 95 | <b>AGLTpPTVHSpASpGK</b>                       | 1172,37 | 2 | 2,05 | C_220028 | gi 27125515 emb CAD27718.1  putative vacuolar ATPase subunit 100 kDa subunit [Mesembryanthemum crystallinum]                                                                                                                                                      |
| 96 | <b>LAAAASGAGSGAGTpLQAYpIGGIPTAATASpAARFER</b> | 3648,66 | 3 | 3,61 | C_220079 | gi 54633411 gb AAV35813.1  kinase domain containing protein [Oryza sativa (japonica cultivar-group)]; gnl CDD 17776 cd00180, S_TKc, serine/threonine protein kinases, catalytic domain                                                                            |
| 97 | SSRMGSSpGGGGGGGGADEDEGSpSAR                   | 2216,98 | 2 | 2,12 | C_220126 | gi 50912113 ref XP_467464.1  putative NAD(P)-dependent cholesterol dehydrogenase [Oryza sativa (japonica cultivar-group)]; gnl CDD 16885 pfam01073, 3Beta_HSD, 3-beta hydroxysteroid dehydrogenase/isomerase family                                               |



|     |                                  |         |   |      |          |                                                                                                                                                                                                                                                                                                                                  |
|-----|----------------------------------|---------|---|------|----------|----------------------------------------------------------------------------------------------------------------------------------------------------------------------------------------------------------------------------------------------------------------------------------------------------------------------------------|
| 98  | SIACVGGLLRSLGHLQVLSYpTpESpLAFR n | 3132,31 | 3 | 2,77 | C_230037 | gi 3894383 gb AAC78591.1  disease resistance protein [ <i>Lycopersicon esculentum</i> ]; gnl CDD 5333 cd00116, LRR_RI, leucine-rich repeats (LRRs), ribonuclease inhibitor (RI)-like subfamily                                                                                                                                   |
| 99  | <b>SpLFEDMDPFIEQLVAR</b>         | 1893,17 | 2 | 2,14 | C_230155 | gi 51703984 gb AAH81318.1  MGC89395 protein [ <i>Xenopus tropicalis</i> ]; CAP10, putative lipopolysaccharide-modifying enzyme                                                                                                                                                                                                   |
| 100 | RTpSpTpGSKVFGCLKGALDGGLDIPHNEK n | 3042,10 | 3 | 2,52 | C_240141 | gi 2599104 gb AAB84056.1  60S ribosomal protein [ <i>Dunaliella salina</i> ]; u.a.: RPL5, cytosolic 80S ribosomal protein L5, cytosolic 60S large ribosomal subunit protein L5                                                                                                                                                   |
| 101 | AGVVSpASpRLLSLPDELQEK            | 2173,24 | 3 | 3,14 | C_250134 | gi 50754691 ref XP_414473.1  similar to sodium bicarbonate cotransporter [ <i>Gallus gallus</i> ]; gnl CDD 14848 cd00204, ANK, ankyrin repeats                                                                                                                                                                                   |
| 102 | <b>KGSpAQIFGFFGK</b>             | 1269,49 | 2 | 4,37 | C_270042 | gi 21616072 emb CAC87810.2  Tic62 protein [ <i>Pisum sativum</i> ]; u.a: TIC62, part of the inner membrane domain of the system for translocating proteins into plastids; gnl CDD 10325 COG0451 WcaG, nucleoside-diphosphate-sugar epimerases [cell envelope biogenesis, outer membrane / carbohydrate transport and metabolism] |

|     |                                                    |         |   |      |          |                                                                                                                                                                                                                                                                                                                    |
|-----|----------------------------------------------------|---------|---|------|----------|--------------------------------------------------------------------------------------------------------------------------------------------------------------------------------------------------------------------------------------------------------------------------------------------------------------------|
| 103 | WGVVTIGATPWVGNYNVPLSpGVDMATpAR                     | 3093,29 | 3 | 3,00 | C_270169 | gi 34898040 ref NP_910366.1  OSJNBa0038F22.18 cDNA; similar to formiminotransferase-cyclodeaminase/ formiminotetrahydrofolate cyclodeaminase [ <i>Oryza sativa</i> (japonica cultivar-group)]; gnl CDD 12966 COG3643, COG3643, glutamate formiminotransferase                                                      |
| 104 | <b>LPSpPPPSPGATAATpAGADAGRGGTpAAATpGAGAS RGR n</b> | 3131,31 | 3 | 3,38 | C_280158 | gi 7630021 emb CAB88363.1  pasticcino 1 [ <i>Arabidopsis thaliana</i> ]; u.a.: FKB9, multidomain protein with FKBP-type peptidyl-prolyl cis-trans isomerase (EC 5.2.1.8) (PPIase) (rotamase), three TPR-repeats, a calmodulin-binding motif, a nuclear localization signal; possibly a fibrinoin C-terminal domain |
| 105 | PYAASVYpSpDLGSpELSQR n                             | 2083,91 | 2 | 2,20 | C_300048 | gi 23479871 gb EAA16587.1  predicted R27-2 protein, unknown function [ <i>Plasmodium yoelii yoelii</i> ]; gnl CDD 16998 pfam01576, myosin_tail_1; gnl CDD 10914 COG1196, Smc, chromosome segregation ATPases; gnl CDD 10293 COG0419, SbcC, ATPase involved in DNA repair                                           |
| 106 | YGDSAAypDDVVAAASpVPAPGPSpSpSpAAAAR n               | 3095,74 | 3 | 2,93 | C_300116 | gi 68365730 ref XP_688712.1  similar to testis expressed gene 9 [ <i>Danio rerio</i> ]                                                                                                                                                                                                                             |
| 107 | <b>FTPTSpPKPPAGAAAGGPSGFGAVHPYGSpSDR n</b>         | 3005,16 | 3 | 4,04 | C_320047 | gi 11094252 dbj BAB17667.1  PEX14 [ <i>Arabidopsis thaliana</i> ]; gnl CDD 15992 pfam04695, Pex14_N, peroxisomal membrane anchor protein (Pex14p) conserved region                                                                                                                                                 |

|     |                                           |         |   |      |          |                                                                                                                                                                                                                                        |
|-----|-------------------------------------------|---------|---|------|----------|----------------------------------------------------------------------------------------------------------------------------------------------------------------------------------------------------------------------------------------|
| 108 | DLFLGLSpGAVGGTLPSpAALFFATpEAAAR           | 2965,03 | 3 | 2,98 | C_330077 | gi 50931181 ref XP_475118.1  putative mitochondrial carrier protein [Oryza sativa (japonica cultivar-group)]                                                                                                                           |
| 109 | <b>MLSpYpIFSpPAGSpKTIVLSpPTpIEAGILR n</b> | 3050,21 | 3 | 2,92 | C_330094 | gi 11991504 emb CAC19663.1  adenylate cyclase [Blumeria graminis]; gnl CDD 37 smart00044, CYCc, adenyl- / guanylyl cyclase, catalytic domain                                                                                           |
| 110 | <b>KYVITpVQLFAPGGGSpR</b>                 | 1853,93 | 2 | 2,47 | C_340071 | gi 66855787 ref ZP_00399859.1  peptidase S8 and S53, subtilisin, kexin, sedolisin: Nepovirus coat protein, N-terminal [Anaeromyxobacter dehalogenans 2CP-C]; gnl CDD 25387 pfam00082, peptidase_S8, subtilase family                   |
| 111 | <b>TpSpHAALRLAPSpPAPPPATSRGAR</b>         | 2326,70 | 2 | 2,15 | C_350048 | gi 62858575 ref NP_001016356.1  hypothetical protein LOC549110 [Xenopus tropicalis]; gnl CDD 14848 cd00204, ANK, ankyrin repeats                                                                                                       |
| 112 | <b>PTFSSpGAGGALGGLDGAAPAAER</b>           | 2111,15 | 3 | 2,99 | C_350061 | gi 45935119 gb AAS79577.1  putative PHD (plant homeo domain) zinc finger protein [Ipomoea trifida]                                                                                                                                     |
| 113 | RSPLTAGTSpSGDGDAGGRAGGGPDPSNLLSpR n       | 3044,97 | 3 | 2,86 | C_350083 | gi 57900392 dbj BAD87602.1  transcriptional regulator family protein-like [Oryza sativa (japonica cultivar-group)]                                                                                                                     |
| 114 | <b>AGAATAAPSpTpGR</b>                     | 995,11  | 2 | 2,19 | C_350089 | gi 50933765 ref XP_476410.1  tetratricopeptide repeat(TPR)-containing protein-like [Oryza sativa (japonica cultivar-group)]; u.a.: protein with similarity to Arabidopsis At4g37460 and rice BAC80093; predicted chloroplast targeting |

|     |                                                                                        |                    |        |              |          |                                                                                                                                                                                                                                                                                                                                                                                |
|-----|----------------------------------------------------------------------------------------|--------------------|--------|--------------|----------|--------------------------------------------------------------------------------------------------------------------------------------------------------------------------------------------------------------------------------------------------------------------------------------------------------------------------------------------------------------------------------|
| 115 | TpMGGELPTLTDPWVREDLTpSpQYHR n                                                          | 3044,03            | 3      | 2,93         | C_360017 | gi 21038943 emb CAD31740.4  chitinase [Tenebrio molitor]; u.a.: putative lectin/glycoside hydrolase, extracellular; gnl CDD 24313 smart00636, Glyco_18 domain                                                                                                                                                                                                                  |
| 116 | SpSpSpGATpSpSLVMPSTAAAVMGATDSSSALRAWR n                                                | 3515,35            | 3      | 3,23         | C_370035 | gi 42572713 ref NP_974452.1  exostosin family protein [Arabidopsis thaliana]                                                                                                                                                                                                                                                                                                   |
| 117 | ISpIDRLAMVGYpPTAAAVTLSFAEVGACR                                                         | 3044,33            | 3      | 3,22         | C_370058 | gi 24583871 ref NP_723736.1  CG31759-PB, isoform B; gene product from transcript [Drosophila melanogaster]; it encodes a product with putative transcription regulator activity putatively involved in nucleobase, nucleoside, nucleotide and nucleic acid metabolism [FlyBase Info]; gnl CDD 14361 COG5239, CCR4, mRNA deadenylase, exonuclease subunit and related nucleases |
| 118 | <b>RQRSpPspPAAAVPSAGGAAGR n</b>                                                        | 1927,03            | 3      | 4,14         | C_370142 | KOG: splicing factor RNPS1, SR protein superfamily                                                                                                                                                                                                                                                                                                                             |
| 119 | <b>TSpVPGSpVAAPATpLDSpPGLASpGGSpPIATpPFTR n</b>                                        | 3052,13            | 3      | 2,94         | C_380133 | gi 62739190 ref NP_067390.3  calcium channel alpha13.2 subunit [Mus musculus]                                                                                                                                                                                                                                                                                                  |
| 120 | <b>FLSGAVALLGTPASpLLVGAVTPVGPSPVMAKPR</b><br><b>FLSGAVALLGTPASpLLVGAVTPVGPSPVMAKPR</b> | 2927,59<br>2945,59 | 3<br>3 | 3,58<br>3,73 | C_390058 | gi 2198677 gb AAB61311.1  htrA-like protein [Haematococcus pluvialis]; u.a.: DEGP1, serine protease, trypsin family, DegP type (HtrA), most similar to At3g27925                                                                                                                                                                                                               |
| 121 | <b>LAAYHLMAGQVLETQRLLSpLDWR</b>                                                        | 2766,11            | 2      | 2,16         | C_390071 | gi 22652299 gb AAN03676.1  putative nucleoporin PRECOZ [Arabidopsis thaliana]; u.a.: similar to NUP98; KOG: nuclear pore complex, Nup98 component                                                                                                                                                                                                                              |

|     |                                       |         |   |      |          |                                                                                                                                                                                                                                                                                                                                                                                                                                 |
|-----|---------------------------------------|---------|---|------|----------|---------------------------------------------------------------------------------------------------------------------------------------------------------------------------------------------------------------------------------------------------------------------------------------------------------------------------------------------------------------------------------------------------------------------------------|
| 122 | <b>RAAFTpLSSpGKSLLL PALPGALPCQVVR</b> | 2927,29 | 3 | 2,82 | C_410119 | gi 39996937 ref NP_952888.1  ATP-dependent helicase HrpB [Geobacter sulfurreducens PCA]; gnl CDD 11354 COG1643, HrpA, HrpA-like helicases                                                                                                                                                                                                                                                                                       |
| 123 | <b>NLVTpDSpEDLEEKPGER</b>             | 1893,90 | 2 | 3,76 | C_460094 | gi 633607 emb CAA58720.1  chloroplastic outer envelope membrane protein (OEP75) [Pisum sativum]; u.a.: similar to Toc75, component of the translocating apparatus of the plastid outer membrane; c. d.: 1. gnl CDD 25688 pfam01103, Bac_surface_Ag, Surface antigen. 2. gnl CDD 13913 COG4775, COG4775, outer membrane protein/protective antigen OMA87. 3. gnl CDD 12184 COG2831, FhaC, hemolysin activation/secretion protein |
| 124 | <b>TKVGDWVGVHYpVGKLENGEEFDNSITR</b>   | 3131,30 | 3 | 2,98 | C_480037 | gi 58386685 ref XP_314956.2  ENSANGP00000019325 [Anopheles gambiae str. PEST]; u.a.: FKB15-2 FKBP-type peptidyl-prolyl cis-trans isomerase (EC 5.2.1.8)                                                                                                                                                                                                                                                                         |
| 125 | <b>RAAGGGGGAGGGGVSpVSAAEVMALER n</b>  | 2325,44 | 2 | 2,41 | C_480048 | gi 30696564 ref NP_851194.1  SWAP (Suppressor-of-White-APricot)/surp domain-containing protein [Arabidopsis thaliana]; gnl CDD 9014 smart00648, SWAP, Suppressor-of-White-APricot splicing regulator; domain present in regulators which are responsible for pre-mRNA splicing processes                                                                                                                                        |
| 126 | <b>QPSAIIPSpATpR</b>                  | 1301,26 | 3 | 2,81 | C_490004 | gi 6850844 emb CAB71083.1  3-methyl-2-oxobutanoate hydroxy-methyl-transferase-like protein [Arabidopsis thaliana]; gnl CDD 3056 pfam02548, pantoate_transf, ketopantoate hydroxymethyltransferase                                                                                                                                                                                                                               |

|     |                                                         |         |   |      |          |                                                                                                                                                                                            |
|-----|---------------------------------------------------------|---------|---|------|----------|--------------------------------------------------------------------------------------------------------------------------------------------------------------------------------------------|
| 127 | SpIPPPAPPVQQQSpQGSRGQGAQSpQK                            | 2927,85 | 3 | 2,55 | C_490062 | gi 30692943 ref NP_190373.2  ubiquitin carboxyl-terminal hydrolase family protein [Arabidopsis thaliana]                                                                                   |
| 128 | <b>ALGFCSpIPAGRLISCTPPDLLVPSpVAER n</b>                 | 2946,39 | 3 | 3,66 | C_580061 | gi 62733652 gb AAX95768.1  putative ribosomal-protein S6 kinase homolog protein [Lycopersicon esculentum]; gnl CDD 17776 cd00180, S_TKc, serine/threonin protein kinases, catalytic domain |
| 129 | <b>LAKTSpLSTVLESpNATpFSpR n</b>                         | 1854,16 | 2 | 2,12 | C_580076 | gi 6016708 gb AAF01534.1  putative protein kinase [Arabidopsis thaliana]; gnl CDD 5392 cd00192, TyrKc, tyrosine kinase, catalytic domain                                                   |
| 130 | <b>FSQVAspAGSpLAGLGLGR n</b>                            | 1653,77 | 2 | 4,48 | C_600010 | gi 77553679 gb ABA96475.1  pyruvate kinase, barrel domain [Oryza sativa (japonica cultivar-group)]; u.a.: PYK2, putative pyruvate kinase, EC 2.7.1.40                                      |
| 131 | IAILAEKFAPSpMQWYMDVVLQLLER                              | 3046,53 | 3 | 3,04 | C_630070 | gi 20466205 gb AAM20420.1  alpha-adaptin [Arabidopsis thaliana]; gnl CDD 25788 pfam01602, adaptin N terminal region                                                                        |
| 132 | <b>TpVLSpIVFTpSpGLTDAARNTLLQSLTpGYSpDLSCMT GAVAAKLR</b> | 4433,83 | 3 | 3,44 | C_630085 | gi 46581099 ref YP_011907.1  hypothetical protein DVU2695 [Desulfovibrio vulgaris subsp. vulgaris str. Hildenborough]; gnl CDD 22634 smart00702, P4Hc, prolyl 4-hydroxylase alpha subunit  |
| 133 | <b>RMGSpDAAALLPDVLLVHGTPADK</b>                         | 2313,57 | 3 | 2,93 | C_660079 | gi 53792603 dbj BAD53618.1  carboxylesterase-like [Oryza sativa (japonica cultivar-group)]; gnl CDD 16555 cd00312, esterases and lipases                                                   |

|     |                                                                                   |                    |        |              |          |                                                                                                                                                                                                                                           |
|-----|-----------------------------------------------------------------------------------|--------------------|--------|--------------|----------|-------------------------------------------------------------------------------------------------------------------------------------------------------------------------------------------------------------------------------------------|
| 134 | CGQLAALVLLTHLLQLCSGLPLAPGLVTPR<br><b>CGQLAALVLLTpHLLQLCSpGLPLAPGLVTR n</b>        | 3052,63<br>3034,63 | 3<br>3 | 3,01<br>2,95 | C_670006 | gi 67941863 ref ZP_00533852.1  ribonucleoside-diphosphate reductase alpha chain [Chlorobium phaeobacteroides BS1]; gnl CDD 11120 COG1405, SUA7, transcription initiation factor TFIIB, Brf1 subunit/transcription initiation factor TFIIB |
| 135 | YGAPVDVWSpAGCTLAELATpGRPLFPGR                                                     | 2966,15            | 3      | 2,99         | C_710045 | gi 74026340 ref XP_829736.1  mitogen activated protein kinase [Trypanosoma brucei]; gnl CDD 17776 cd00180, S_TKc, serine/threonine protein kinases, catalytic domain                                                                      |
| 136 | <b>DYpELEGTAVTCSDDTTIKIWDLSpK</b>                                                 | 2766,93            | 2      | 2,18         | C_720047 | gi 75907778 ref YP_322074.1  WD-40 repeat [Anabaena variabilis ATCC 29413]                                                                                                                                                                |
| 137 | DYCIKVDTRTPQSpVGEFGTpLDSASGR n                                                    | 3150,21            | 3      | 3,62         | C_740064 | gi 68126596 emb CAJ03967.1  G-protein (beta)-like protein; beta transducin-like protein; guanine nucleotide-binding protein beta subunit-like protein [Leishmania major]; gnl CDD 5398 cd00200, WD40 domain                               |
| 138 | <b>YTpPNLDPGRVSpTDPTpLLSPVEPCPPGER n</b>                                          | 3052,46            | 3      | 3,11         | C_750015 | gi 67926838 ref ZP_00520033.1  protein of unknown function DUF11 [Solibacter usitatus Ellin6076]; c.d.: FTP, eel-fucolectin tachylectin-4 pentaxrin-1 domain                                                                              |
| 139 | <b>IGKSSGIIpATpSSpIQNVLFFTpRECLR n</b><br><b>IGKSSGIIpATpSpSpIQNVLFFTpRECLR n</b> | 3051,21<br>3033,21 | 3<br>3 | 2,71<br>2,74 | C_800030 | gi 77164348 ref YP_342873.1  alpha amylase, catalytic region [Nitrosococcus oceani ATCC 19707]; Interpro Desc.: ATP/GTP-binding site motif A (P-loop)                                                                                     |

|     |                                                                                       |                    |   |              |          |                                                                                                                                                                                                                                                              |
|-----|---------------------------------------------------------------------------------------|--------------------|---|--------------|----------|--------------------------------------------------------------------------------------------------------------------------------------------------------------------------------------------------------------------------------------------------------------|
| 140 | AHTpSTpTpGESSpVDLVSpYVEFQRNYR n                                                       | 3147,81            | 3 | 2,66         | C_800032 | 488 AS, for 241: gi 66818687 ref XP_643003.1  hypothetical protein DDB0202917 [Dictyostelium discoideum]; gnl CDD 5369 cd00130, PAS domain                                                                                                                   |
| 141 | <b>FSpSpLWAIDGSpASpAQLQVTpSpGYFSSGR n</b><br><b>FSSpLWAIDGSpASpAQLQVTpSGYpFSSGR n</b> | 2926,98<br>2944,98 | 3 | 2,60<br>2,93 | C_800038 | gi 7489849 pir T10518 fruit bromelain (EC 3.4.22.33) FB1035 precursor - pineapple (fragment) gi 2463588 dbj BAA22546.1  FB1035 precursor [Ananas comosus]; u.a.: N-terminal papaine-type Cys protease domain; gnl CDD 28332 cd02248, peptidase C1A subfamily |
| 142 | <b>NRGGFYLDLTAGAAAQAADNTpWSpQQR</b>                                                   | 2943,91            | 3 | 2,76         | C_850041 | gi 50920439 ref XP_470580.1  putative membrane protein [Oryza sativa (japonica cultivar-group)]; gnl CDD 24323 smart00665, B561, cytochrome b-561 / ferric reductase transmembrane domain                                                                    |
| 143 | GTFLGGDSpSpPALTWLESpKIAAVTDIPR n                                                      | 3044,09            | 3 | 3,15         | C_860022 | gi 40809925 dbj BAD07294.1  prolyl 4-hydroxylase [Nicotiana tabacum]; KOG: prolyl 4-hydroxylase alpha subunit                                                                                                                                                |
| 144 | PTATTPNALVDSLLVGQSpNTTpAK n                                                           | 2460,51            | 3 | 2,62         | C_870040 | gi 9651031 dbj BAB03528.1  fucolectin-6 [Anguilla japonica]; gnl CDD 15031 smart00607, FTP, eel-fucolectin tachylectin-4 pentaxrin-1 domain                                                                                                                  |
| 145 | AGAIFTpIGAVGR                                                                         | 1213,31            | 2 | 2,03         | C_900005 | gi 55644247 ref XP_511104.1  predicted golgi apparatus protein 1 [Pan troglodytes]; gnl CDD 1394 pfam00839, Cys_rich_FGFR, cysteine rich repeat                                                                                                              |



|     |                                       |         |   |      |          |                                                                                                                                                                                                  |
|-----|---------------------------------------|---------|---|------|----------|--------------------------------------------------------------------------------------------------------------------------------------------------------------------------------------------------|
| 146 | LPATpLYQLHSpTALVLRaalQRPLTR           | 2964,29 | 3 | 2,67 | C_910024 | gi 68478074 ref XP_716906.1  adenylate cyclase [Candida albicans SC5314]; c.d.: adenylyl- /guanylyl cyclase, catalytic domain                                                                    |
| 147 | GGGGSGEGSDDGALSpPTpSpSpSVPARDQGRR n   | 3095,72 | 3 | 2,69 | C_910028 | 1610 AS, for 50: gi 18390446 ref NP_563719.1  ubiquitin-specific protease 2 (UBP2) [Arabidopsis thaliana]; gn CDD 28362 cd02257, peptidase_C19, peptidase C19 contains ubiquitinyl hydrolases    |
| 148 | ITDAQALLRSpEFVEGDIIITVTLR             | 2641,90 | 3 | 3,29 | C_910060 | gi 54035749 sp O87444 CLPB_PLEBO chaperone clpB; gn CDD 10413 COG0542, ClpA, ATPases with chaperone activity, ATP-binding subunit; KOG: chaperone HSP104 and related ATP-dependent Clp proteases |
| 149 | <b>MTpDSpGTPFVPVCVPTpCTpENSpCPAGK</b> | 2925,68 | 3 | 2,53 | C_920010 | gi 62647053 ref XP_578230.1  similar to neurogenic locus notch homolog protein 1 precursor (Notch 1) (Motch A) (mT14) (p300) [Rattus norvegicus]                                                 |
| 150 | <b>TYpDLILMDIHMPMDGLEASpKR n</b>      | 2641,98 | 3 | 3,77 | C_930062 | gi 75907252 ref YP_321548.1  multi-sensor hybrid histidine kinase [Anabaena variabilis ATCC29413]; u.a.: HKR2, putative histidine kinase response regulator, PAC motif                           |
| 151 | <b>SpHLSIDDTGAAPGAAGALLLVYQLRR n</b>  | 2649,02 | 2 | 2,29 | C_940010 | gi 27524348 emb CAC81748.1  adenylate cyclase [Aspergillus fumigatus]; gn CDD 37 smart00044, CYCc, adenylyl- / guanylyl cyclase, catalytic domain                                                |

|     |                                     |         |   |      |           |                                                                                                                                                                                                                                                                               |
|-----|-------------------------------------|---------|---|------|-----------|-------------------------------------------------------------------------------------------------------------------------------------------------------------------------------------------------------------------------------------------------------------------------------|
| 152 | FITADTpECDTpLANVLANAPK n            | 2268,32 | 2 | 2,29 | C_980022  | gi 18765766 dbj BAB85219.1  matrix metalloproteinase [Volvox carteri f. nagariensis];u.a.: matrix metalloproteinase, MMP, with atypical QExxH site showing copper preference, gnl CDD 23772 pfam05548, peptidase_M11, gametolysin peptidase M11                               |
| 153 | <b>TpQPTASPLRSRWSR</b>              | 1723,81 | 2 | 2,32 | C_980037  | c.d.: RNA-binding region RNP-1 (RNA recognition motif)                                                                                                                                                                                                                        |
| 154 | AGVERSFVQFVLEPLYpK                  | 2063,28 | 2 | 3,10 | C_990022  | gi 51090357 dbj BAD35618.1  putative elongation factor 2 [Oryza sativa (japonica cultivar-group)]; u.a.: EFG3 like elongation factor 2 (EF-2), EF-Tu/also similar to U5 snRNP-specific protein, 116 kDa gnl CDD 10353 COG0480, FusA, translation elongation factors (GTPases) |
| 155 | VQGDEGGKAATpAGTGPAGSpSSpSpGSGMLLR n | 2927,72 | 3 | 2,57 | C_1000002 | gi 67469291 ref XP_650626.1  protein kinase, putative [Entamoeba histolytica HM-1:IMSS]; gnl CDD 17776 cd00180, S_TKc, serine/threonine protein kinases                                                                                                                       |
| 156 | <b>KTpLSYAVAELTpKDAEK</b>           | 1927,96 | 3 | 2,92 | C_1000008 | gi 50258251 gb EAL20943.1  hypothetical protein CNBE0100 [Cryptococcus neoformans var. neoformans B-3501A]; gnl CDD 11942 COG2236, COG2236, predicted phosphoribosyltransferases                                                                                              |
| 157 | ILWAFKLNPFEKLNLFHDATpPEEIK          | 3095,48 | 3 | 2,68 | C_1090047 | gi 13374867 emb CAC34501.1  putative protein [Arabidopsis thaliana]; gnl CDD 24391 pfam00226, DnaJ domain                                                                                                                                                                     |

|     |                                                                     |                    |        |              |           |                                                                                                                                                                                                                                           |
|-----|---------------------------------------------------------------------|--------------------|--------|--------------|-----------|-------------------------------------------------------------------------------------------------------------------------------------------------------------------------------------------------------------------------------------------|
| 158 | PVSDEEAAALAAAAGDTRPWSpSPR n                                         | 2506,56            | 3      | 2,76         | C_1100034 | gi 26333531 dbj BAC30483.1  unnamed protein product [Mus musculus]; gn CDD 24291 smart00487, DEXDc, DEAD-like helicases superfamily                                                                                                       |
| 159 | SSSNFDTGSVGSgTPRGGNQVRHVFTpGPR                                      | 3043,11            | 3      | 3,10         | C_1250032 | gi 7547107 gb AAF63779.1  unknown protein [Arabidopsis thaliana]; gn CDD 28418 cd01994, Alpha_ANH_like_IV, this is a subfamily of adenine nucleotide alpha hydrolases superfamily                                                         |
| 160 | GSpSTGQLPLRPTPVEVPSVPSLQPPSLTR                                      | 3079,39            | 3      | 2,67         | C_1260006 | gi 66815923 ref XP_641978.1  tyrosine kinase-like protein [Dictyostelium discoideum]; KOG: tyrosine kinase specific for activated (GTP-bound) p21cdc42Hs; gn CDD 17776 cd00180, S_TKc, serine/threonine protein kinases, catalytic domain |
| 161 | <b>AAVGAGTpVAGGLGAVGSpAGGVGSLGGSpAADVS pSpP</b>                     | 2946,88            | 3      | 2,98         | C_1260011 | gi 20466448 gb AAM20541.1  putative vacuolar proton-ATPase subunit [Arabidopsis thaliana]; gn CDD 23219 pfam01496, V_ATPase_I, V-type ATPase 116kDa subunit family                                                                        |
| 162 | <b>MSpSpIFGSITVETPKYTVLKTSGAELR n</b>                               | 3052,57            | 3      | 2,75         | C_1270009 | gi 30687330 ref NP_565876.2  SOUL heme-binding family protein [Arabidopsis thaliana]                                                                                                                                                      |
| 163 | RLSpSpTSMSGTPTTPARPTSpGER n                                         | 2518,43            | 3      | 2,96         | C_1290019 | gi 47220696 emb CAG11765.1  unnamed protein product [Tetraodon nigroviridis]; gn CDD 3835 smart00153, VHP, villin headpiece domain                                                                                                        |
| 164 | <b>KESVAEKSpFYEVAR n</b><br>SLSpSpIDAATAHEDLPDTEALLAGTFGAYYSGSGSK n | 1625,82<br>3664,67 | 3<br>3 | 4,64<br>4,38 | C_1310007 | u.a.: hypothetical protein, has limited similarity to the haploid specific alanine rich acidic protein, chromosome X in mouse                                                                                                             |

|     |                                                       |                    |        |              |           |                                                                                                                                                                                                                                                          |
|-----|-------------------------------------------------------|--------------------|--------|--------------|-----------|----------------------------------------------------------------------------------------------------------------------------------------------------------------------------------------------------------------------------------------------------------|
| 165 | <b>QKFVYpVLNRDAAANLTISpSPLEAHK</b>                    | 2947,13            | 3      | 2,72         | C_1340045 | gi 7019655 emb CAB75756.1  Gene info spliceosomal-like protein [Arabidopsis thaliana]; KOG: splicing factor 3b, subunit 3; gnl CDD 26038 pfam03178, CPSF_A, CPSF A subunit region                                                                        |
| 166 | LLLQFSpYpPVNLLMLK<br>VSVTLTVEGGASSpPLQLSDGGGVGGASTMTK | 1953,21<br>2945,14 | 2<br>3 | 2,22<br>2,63 | C_1360021 | gi 66806589 ref XP_637017.1  hypothetical protein DDB0219267 [Dictyostelium discoideum]; gnl CDD 12045 COG2373, COG2373, large extracellular alpha-helical protein                                                                                       |
| 167 | VDLVTDpASDVVLHWGVSPIGSR                               | 2504,68            | 2      | 2,37         | C_1470018 | gi 20384925 gb AAM18228.1  R1 [Citrus reticulata]; gnl CDD 9298 pfam01326, PPK_N, pyruvate phosphate dikinase, PEP/pyruvate binding domain                                                                                                               |
| 168 | <b>PPATPPTpGPGAGGLAGVR</b>                            | 1653,76            | 2      | 2,36         | C_1620002 | gi 15668711 ref NP_247510.1  hypothetical protein MJ0531 [Methanocaldococcus jannaschii DSM2661]; gnl CDD 10459 COG0589, UspA, universal stress protein UspA and related nucleotide binding proteins                                                     |
| 169 | <b>MYpKEVKYpDDEITLR n</b>                             | 1964,02            | 2      | 2,76         | C_1650015 | gi 34897012 ref NP_909852.1  putative thiamin biosynthesis protein [Oryza sativa]; gnl CDD 2489 pfam01964, ThiC, ThiC family                                                                                                                             |
| 170 | MTpSRSRGPAAVAAVVGK                                    | 1738,93            | 3      | 2,56         | C_1690026 | gi 50929653 ref XP_474354.1  gene info OSJNBa0064G10.19 [Oryza sativa (japonica cultivar-group)]; U.a.: EFG4 GTP binding elongation factor-like protein; conserved domain; gnl CDD 14378 COG5256, TEF1, translation elongation factor EF-1alpha (GTPase) |

|     |                                                |         |   |      |           |                                                                                                                                                                                                             |
|-----|------------------------------------------------|---------|---|------|-----------|-------------------------------------------------------------------------------------------------------------------------------------------------------------------------------------------------------------|
| 171 | YTpIEEVLGAGSNAVAYR n                           | 1893,97 | 2 | 2,66 | C_1800013 | gi 23125436 ref ZP_00107369.1  COG0515: serine/threonine protein kinase [Nostoc punctiforme PCC 73102]; gnl CDD 17776 cd00180, S_TKc, serine/threonine protein kinases, catalytic domain                    |
| 172 | GAAYpSAVQSpASpASPAGSPSR                        | 2062,85 | 2 | 2,75 | C_1950015 | gi 3488 emb CAA27175.1  unnamed protein product [Saccharomyces cerevisiae]; gnl CDD 37 smart00044, CYCc, adenylyl- /guanylyl cyclase [synthesis of cAMP], catalytic domain                                  |
| 173 | <b><i>TpCLRASEELAPFLQPAKR</i></b>              | 2111,35 | 3 | 3,52 | C_1960007 | gi 50508194 dbj BAD31511.1  exocyst complex component Sec8-like [Oryza sativa (japonica cultivar-group)]; gnl CDD 9607 pfam04048, Sec8_exocyst, Sec8 exocyst complex component specific domain              |
| 174 | VLETpLHDASQQSpAAVAASAGAPAPSpGPSpYNTSLGG TSVR n | 4047,91 | 3 | 3,43 | C_2530002 | gi 42563356 ref NP_178082.2  protein kinase family protein [Arabidopsis thaliana]; gnl CDD 17776 cd00180, S_TKc, serine/threonine protein kinases, catalytic domain                                         |
| 175 | <b><i>KLAASpGEKPEPVR</i></b>                   | 1364,59 | 3 | 2,97 | C_3470003 | gi 31126745 gb AAP44665.1  putative 40S ribosomal protein S15 [Oryza sativa (japonica cultivar-group)]; u.a.: RPS15, cytosolic 80S ribosomal protein S15; cytosolic 40S small ribosomal subunit protein S15 |

|     |                                      |         |   |      |            |                                                                                                                                                                                                                         |
|-----|--------------------------------------|---------|---|------|------------|-------------------------------------------------------------------------------------------------------------------------------------------------------------------------------------------------------------------------|
| 176 | PVSSGAAVQLALPASpLKNIHHTFHVSMVR       | 3149,56 | 3 | 3,00 | C_3540003  | gi 28558781 gb AAO45752.1  pol protein is encoded by a resistance gene cluster (coding reverse transcriptase, RNase H and integrase) [Cucumis melo]; gnl CDD 25582 pfam00665, rve, integrase core domain                |
| 177 | AASpAPTAGAGASSAGGSpSpAAAAK n         | 2127,93 | 2 | 2,46 | C_3630002  | gi 16331146 ref NP_441874.1  serine/threonine protein kinase [Synechocysis sp. PCC 6803]                                                                                                                                |
| 178 | <b>EINKSpPYAKQALELSR</b>             | 1830,09 | 2 | 2,51 | C_3630003  | gi 6714430 gb AAF26118.1  putative 26S proteasome regulatory subunit [Arabidopsis thaliana]; KOG: AAA+-type ATPase                                                                                                      |
| 179 | <b>YPKISpTpPSpLQK n</b>              | 1502,42 | 2 | 2,36 | C_3670002  | gi 57104060 ref XP_534343.1  similar to Rpl23a protein [Canis familiaris]; u.a.: RPL23a, 60S ribosomal protein L23a                                                                                                     |
| 180 | TTpLVFNIPLAEVVTDYpFDQLKSR SK n       | 3046,25 | 3 | 2,80 | C_6660001  | gi 50252173 dbj BAD28168.1  putative LepA protein [Oryza sativa (japonica cultivar-group)]; u.a.: EFG9 putative C-terminal of elongation factor G; gnl CDD 26534 pfam06421, LepA_C, GTP-binding protein LepA C-terminus |
| 181 | <b>LSpNVAVDAVFDSpVSIATpTpFKADLLK</b> | 2945,92 | 3 | 3,02 | C_7720002  | gi 22298033 ref NP_681280.1  ABC transporter subunit [Thermosynechococcus elongatus BP-1]; u.a.: related to SufB, which is involved in FeS cluster biogenesis in plastids                                               |
| 182 | <b>LRDEQKTpLSDSLPPILQYpALGQVAK</b>   | 2945,15 | 3 | 3,51 | C_10310002 | gi 10174798 dbj BAB05898.1  ATP-dependent proteinase [Bacillus halodurans C-125]; gnl CDD 5390 cd00189, TPR, tetratricopeptide repeat domain                                                                            |

|     |                                    |         |   |      |                   |                                                                                                                                                                                                                      |
|-----|------------------------------------|---------|---|------|-------------------|----------------------------------------------------------------------------------------------------------------------------------------------------------------------------------------------------------------------|
| 183 | <b>QICNHPALYpLKETEPK</b>           | 1965,16 | 2 | 2,97 | C_24980001        | gi 52140319 ref YP_086511.1  SNF2 family helicase [Bacillus cereus E33L]; gnl CDD 10424 COG0553, HepA, superfamily II DNA/RNA helicases, SNF2 family                                                                 |
| 184 | <b>RAVTpWVNEVR</b>                 | 1212,40 | 2 | 3,15 | AV393403          | gi 7270530 emb CAB81487.1  putative protein [Arabidopsis thaliana]; gnl CDD 5392 cd00192, TyrKc, tyrosine kinase, catalytic domain; gnl CDD 17776 cd00180, S_TKc, serine/threonine protein kinases, catalytic domain |
| 185 | SpKGILAIKGSDDK                     | 1412,51 | 2 | 2,61 | 1030070A09.y<br>1 | gi 35211095 dbj BAC88475.1  glr0534 [Gloeobacter violaceus PCC 7421]; gnl CDD 24627 pfam02492, cobW, cobalamin synthesis protein/P47K                                                                                |
| 186 | <b>PYpWRCYFPCTpQAIYVVDSpTpDTER</b> | 3052,25 | 3 | 2,83 | 91.39.1.0         | gi 3182922 sp Q96361 ARF1_BRARP ADP-ribosylation factor 1 gi 1654142 gb AAB17725.1  small GTP-binding protein ARF; gnl CDD 5377 cd00154, RAB, Rab subfamily of small GTPases                                         |

Theor. mass, theoretical mass of the peptide ion [MH+]; z, charge; cp, chloroplast genome; u.a., user annotation notes, which can be found on the JGI web site under the gene model number; c.d. conserved domain; Tp, phosphorylated Thr or Methyldehydroalanine; Sp, phosphorylated Ser or Dehydroalanine; Yp, phosphorylated Tyr; n, the exact phosphorylation site(s) within the peptide cannot be specified with certainty; **bold writing**, the phosphopeptide was identified by MS/MS and in addition by MS/MS/MS spectra; **bold and in parallel italics writing**, the peptide was solely identified by MS/MS/MS spectra.
