# Supplementary material
Source: PubMed Central journal article supplement (PMC1398068)
Supplement: eukcell_5_3_457__2.pdf [file eukcell_5_3_457__2.pdf]

TABLE S2. Novel proteins of *Chlamydomonas reinhardtii* that are phosphorylated of yet unknown function

| No. | Phosphopeptide sequence                        | Theor. mass [MH+] | z | Xcorr | Gene model (JGI, vs2) / EST |
|-----|------------------------------------------------|-------------------|---|-------|-----------------------------|
| 1   | <b>STpLAGLMASAGSpGTpESpGGRRVTpSpPGSAAGSR n</b> | 2926,03           | 3 | 3,17  | C_10128                     |
| 2   | <b>ATALTpGGLEDSLr</b>                          | 1286,43           | 2 | 2,17  | C_10259                     |
| 3   | HSpHTpPSpANTAPPRPAAAVLPDTLLPSVTSplR n          | 3496,50           | 3 | 2,67  | C_10312                     |
| 4   | QAAGGTpPVGR                                    | 993,98            | 2 | 2,27  | C_20189                     |
| 5   | GSYpDPLGAALLVMRGAGANPFYSDSpRQR n               | 3131,26           | 3 | 2,59  | C_20338                     |
| 6   | GVGLLGVSpKRQVEILMK                             | 1965,29           | 2 | 2,17  | C_30141                     |
| 7   | MYPNATpFVFNK                                   | 1412,53           | 2 | 2,25  | C_30198                     |
| 8   | <b>EAHSpGTpTpSpASpQTpLPLADTpADLR</b>           | 2313,33           | 3 | 2,82  | C_40005                     |
| 9   | ASpGTpGGGLHLTLRMTLVSpANLTAVRVR n               | 3080,24           | 3 | 2,71  | C_40099                     |
| 10  | <b>KGTpGFSFFGTpGK n</b>                        | 1296,37           | 2 | 3,51  | C_50124                     |
|     | <b>TGSpGFSFFGTGK n</b>                         | 1175,29           | 2 | 2,99  |                             |
|     | <b>AGSpGFNFFGTpGK n</b>                        | 1252,27           | 2 | 2,92  |                             |
|     | <b>AGSGFNFFGTpGK n</b>                         | 1172,29           | 2 | 3,49  |                             |
|     | <b>KAAGFFGTpGR</b>                             | 994,15            | 2 | 3,78  |                             |
| 11  | WDLLEEVAAQMSpTRSpANVK n                        | 2406,49           | 2 | 2,27  | C_60045                     |
| 12  | QTpSpQCSpTpPTPSQLAAAAPYpGGGSpGAR n             | 2945,52           | 3 | 2,70  | C_70008                     |
| 13  | <b>PSpATpSpTpSpGQDGSAPQPTpSpSAPK</b>           | 2112,08           | 3 | 3,48  | C_70009                     |
| 14  | VAISpAAAAAANAASGAQAGVNGDTpRMVVK                | 2946,08           | 3 | 2,82  | C_100181                    |
| 15  | GAAAAISpSpKR                                   | 994,04            | 2 | 2,04  | C_110045                    |
| 16  | <b>LASpSpQQASTpPLQK n</b>                      | 1501,47           | 2 | 2,27  | C_110173                    |
| 17  | <b>PQGRGAGSGGGDPLTpR</b>                       | 1563,55           | 2 | 2,18  | C_120170                    |
| 18  | <b>QPAAPGTpGSpSpSSpGRCAAAGQQQR n</b>           | 2328,41           | 3 | 3,19  | C_120219                    |
| 19  | <b>TpAAENSAAVTAAAEAEAEARRR</b>                 | 2328,46           | 3 | 2,74  | C_130160                    |
| 20  | <b>YGYGSpDDEYIATPYK n</b>                      | 1724,82           | 2 | 4,32  | C_130182                    |
| 21  | PFANDTpSPSpRDFVAAALLGSpGGGSpGGGGGRGGGGGR       | 3498,26           | 3 | 3,10  | C_140054                    |
| 22  | <b>YSGGGGEPAAWRGTPPEPMTpAAAWAKASpGPR</b>       | 3051,25           | 3 | 3,14  | C_140167                    |
| 23  | PDGASpAQSAVLTAAFPQAHRREVLRSR n                 | 3043,24           | 3 | 3,13  | C_150041                    |
| 24  | <b>RYFDSpADYNLQK n</b>                         | 1502,63           | 2 | 3,79  | C_150106                    |

|    |                                            |         |   |      |          |
|----|--------------------------------------------|---------|---|------|----------|
| 25 | <b>LFSALSGAFSpQRNVDLAGK n</b>              | 1964,23 | 2 | 2,42 | C_150135 |
| 26 | HTpADEAAGSWQHASpWDALRGSpERGSR n            | 3079,88 | 3 | 2,54 | C_160128 |
| 27 | <b>SLGGRKVWVPDSpNSpFDGPTpTATpSpMSpEK n</b> | 2846,10 | 3 | 3,11 | C_180171 |
| 28 | IIEHALNIKAYYpLQAQHLRAAGSLR n               | 3094,46 | 3 | 3,27 | C_190171 |
| 29 | SpSQSPGGKKQQQELGPSAAQVAPPR n               | 2614,75 | 3 | 3,47 | C_200012 |
| 30 | <b>ALGGTGAAypNALDspAAMLQR</b>              | 2112,14 | 3 | 4,25 | C_200072 |
| 31 | <b>DYpAAMAkDNATpKTEQLYTTK</b>              | 2326,48 | 2 | 2,19 | C_210065 |
| 32 | <b>EPSPAVNTSVNATGGTAAA VPGLSR</b>          | 2405,50 | 2 | 2,45 | C_210132 |
| 33 | <b>VAIAMVLERLTTPVEEVAKALAAyTPVAR</b>       | 3050,39 | 3 | 2,93 | C_240085 |
| 34 | <b>EASGKEAAPAATSpGAAGAKDgK</b>             | 1928,07 | 3 | 2,59 | C_270119 |
| 35 | FLKLAEAFPETpR                              | 1502,63 | 2 | 2,43 | C_280034 |
| 36 | <b>PRSSGTpGTGTGGAATpDRSHSpR n</b>          | 1963,07 | 2 | 2,40 | C_290127 |
| 37 | <b>VQQALLETPAKQLEDATpADKHALLER</b>         | 2757,13 | 3 | 2,62 | C_300047 |
| 38 | SpPGAVLLASPRSPGAPGLLFPDTPGGSpPPHR          | 3150,22 | 3 | 2,82 | C_320075 |
| 39 | <b>MAAVSKCQSpEGVRPDAVSpAATpSpR</b>         | 2642,53 | 3 | 3,12 | C_350081 |
| 40 | <b>IDFSAISpGR</b>                          | 948,07  | 2 | 2,73 | C_360092 |
| 41 | TpSpSpGACGTASpCACACGTpCGTCSpCVWSpCGELR n   | 3497,21 | 3 | 2,80 | C_370107 |
| 42 | SpLTAAVGRIATQPNVYVPRDK                     | 2337,56 | 3 | 2,67 | C_390020 |
| 43 | <b>NFKEYFEFEGSpTAKVGK n</b>                | 1964,18 | 2 | 2,56 | C_390083 |
| 44 | PRPAGYPGVQRVSpSpTNGNITLLTpTDLK n           | 3097,16 | 3 | 3,90 | C_420066 |
| 45 | VAVGVCQMLPPLLASRGYpTGSQALAAALTR n          | 3096,56 | 3 | 2,79 | C_430098 |
| 46 | <b>VRGTADAGVAAAGTADAAGGARSpR</b>           | 2112,27 | 3 | 3,81 | C_440055 |
| 47 | <b>KPSpARMSpQAVYK</b>                      | 1330,62 | 2 | 2,46 | C_450080 |
| 48 | <b>FFTpTLPALTQLPNTpSpTpAASpHTR n</b>       | 2384,63 | 3 | 3,11 | C_480027 |
|    | FDGYpIVTpQPMYETpRRAQYSNITR n               | 3051,07 | 3 | 2,64 |          |
| 49 | <b>QQVSLLTpALLQEQR</b>                     | 1894,18 | 2 | 2,51 | C_520072 |
| 50 | <b>PVLAEIPDPRQYVEAALARVGASSpPTR</b>        | 2945,22 | 3 | 3,43 | C_560107 |
| 51 | VPFPGAHTLPGATPPSpPQHTpGGPKPSTRQA n         | 3150,29 | 3 | 3,00 | C_580029 |
| 52 | <b>ATpASpSpVLPLAAALGTpVGVALISpTVLGLLLK</b> | 2927,39 | 3 | 3,87 | C_580033 |
| 53 | <b>AAAAADAASpGAGGTKSPKPPQR</b>             | 1963,16 | 2 | 2,10 | C_600033 |
| 54 | CTpLRSGAGAGGLAAGLGLAFAAAAAGEAAPAAVTPR n    | 3149,47 | 3 | 2,83 | C_600081 |
| 55 | <b>KAVSpPQSpPPSpPNQESAMNAR n</b>           | 2239,26 | 3 | 5,14 | C_620036 |
|    | <b>KAVSPQSpPPSpPNQESAMNAR n</b>            | 2159,28 | 3 | 5,59 |          |
| 56 | LTpTpTpLVDRAGSPDELTRLTAIHWLR n             | 3077,17 | 3 | 3,22 | C_650063 |

|    |                                                |         |   |      |           |
|----|------------------------------------------------|---------|---|------|-----------|
| 57 | RLSpSpEAGYALQR n                               | 1511,45 | 2 | 3,78 | C_670063  |
| 58 | HDVVTPAVSSCTpYVTVTpATpCK n                     | 2406,30 | 2 | 2,47 | C_740004  |
| 59 | <b>GSpGSpGHGGNGTpAANVAGASpWVRR</b>             | 2406,22 | 2 | 2,40 | C_740055  |
| 60 | QTSpRASpVDDEVLPtDEIAK n                        | 2235,18 | 3 | 4,53 | C_800072  |
|    | <b>QTpSpRASpVDDEVLPtDEIAK n</b>                | 2119,20 | 2 | 4,44 |           |
| 61 | STpSARSpLDVHTAEPVAAAAAGAR n                    | 2370,35 | 3 | 4,30 | C_820009  |
|    | <b>AGSpSSpGRLSRTpASpIQR n</b>                  | 1562,78 | 2 | 2,05 |           |
| 62 | PPAVPPSLSpPRSTGPPHTpQHQR n                     | 2505,57 | 3 | 2,98 | C_890013  |
| 63 | <b>LVDDLLGRATSpGTSSpASGATHTpSpHSHR n</b>       | 2944,81 | 3 | 4,19 | C_920015  |
| 64 | <b>RSpGAASpVTVVLPGGGSpGGPGHSpR</b>             | 2384,17 | 3 | 2,64 | C_920038  |
| 65 | <b>TATSpRDSSPDTSpAR n</b>                      | 1514,45 | 2 | 2,65 | C_1050045 |
| 66 | <b>RMLMPLVPASGDGWSRLSpR n</b>                  | 2112,53 | 3 | 3,64 | C_1080010 |
| 67 | <b>PPASpGTpWQSpAAGEQAQPASLLQLQLR</b>           | 2946,94 | 3 | 2,89 | C_1100026 |
| 68 | <b>EITpLDRLYTA VGAVCYDGAISGITGSpR n</b>        | 2865,12 | 3 | 2,86 | C_1180012 |
| 69 | <b>VPMSpVGSpDDEVPSpDAEGDVPVVGIRPSGGAFR n</b>   | 3359,58 | 3 | 4,07 | C_1200006 |
| 70 | <b>ASSGTAASpSTpSpGGGGAGTGPVSGVVRAAYRR</b>      | 3050,92 | 3 | 3,10 | C_1200033 |
| 71 | <b>PGAYpVSEAEAGPEASHVSPPPAK</b>                | 2329,40 | 3 | 3,34 | C_1210024 |
| 72 | <b>GAGLSpPVGSpiGSPGGLK n</b>                   | 1516,63 | 2 | 3,78 | C_1220012 |
| 73 | <b>SpSAGGEEAQAAGAATpSpRGLRHTpPTpGDAGSGTR n</b> | 3051,11 | 3 | 3,03 | C_1280007 |
| 74 | GLVELDLRPSHGSpVCDEALGAVASTpSSpL n              | 3025,02 | 3 | 3,14 | C_1290028 |
| 75 | IFSKGDGGAATpTYEEALNATpRVVDQLR n                | 3044,11 | 3 | 2,87 | C_1480031 |
| 76 | <b>SpAASCgisMAPVQLSAAAAAAAAAAGGVTpGAAVR</b>    | 2946,28 | 3 | 2,78 | C_1510026 |
| 77 | FFGGDSpGEWDEVQLER                              | 1951,92 | 2 | 4,04 | C_1660033 |
| 78 | <b>SpPTpQAAASpILPAGAASALVSpPSpASKQSR</b>       | 2927,84 | 3 | 3,39 | C_1740014 |
| 79 | AMAGLISADRSSSpGSAYTLACAPGTGAVAAALR n           | 3149,44 | 3 | 2,64 | C_1850001 |
| 80 | SpRSpLLQLVPLSQSLTpEDDQSpLRR n                  | 2962,87 | 3 | 2,77 | C_1860007 |
| 81 | <b>RGMRLAQEAATpAAATpASpVDLTATAEAR</b>          | 2944,94 | 3 | 2,98 | C_1880014 |
| 82 | FISGPYPFDVIPSQYEHVTpTSR n                      | 2604,64 | 3 | 3,13 | C_1970020 |
| 83 | TpSTYPGLVRNLLEGpAGPDDTpEWPQGK n                | 3042,97 | 3 | 2,96 | C_1990015 |
| 84 | <b>VAATASpALTpGSpSpSpPR</b>                    | 1286,50 | 2 | 2,10 | C_2220010 |
| 85 | <b>NVIVVAVADDASpCPLAVR</b>                     | 1893,09 | 2 | 2,39 | C_2230006 |
| 86 | LLVSpPQPLGELLSIELTpCQQPGILSpTR n               | 3147,36 | 3 | 2,78 | C_2370008 |
| 87 | <b>GGRGGGSGSGSpGSpSAAAVGPGGAAEGIR n</b>        | 2406,43 | 2 | 2,26 | C_2420007 |
| 88 | FVSpDATVPSpAKITESQVSRAGVVGSGPAGGR n            | 3149,25 | 3 | 2,74 | C_2670002 |

|     |                                                   |         |   |      |                                        |
|-----|---------------------------------------------------|---------|---|------|----------------------------------------|
| 89  | TPVLVGSppPAPTpCDLRGAAPPPGTHTCIR n                 | 3043,30 | 3 | 3,28 | C_2700008                              |
| 90  | <b>GLGGADGGGAMAAGPQLPAGLHSpSpSpSATpRSpSAADR n</b> | 3050,35 | 3 | 3,68 | C_2940001                              |
| 91  | GSAVNSpEADGAEGK                                   | 1372,27 | 2 | 2,17 | C_3850003                              |
| 92  | SpDPNLDGPTGKATpLAAMSR                             | 2063,07 | 3 | 2,78 | C_4820001                              |
| 93  | TASASLCSpAEKVTIKVSFHR n                           | 2216,44 | 2 | 2,13 | C_5060003                              |
| 94  | HPHQATPQSHASpHATPSLSpHSpQSQR                      | 3042,86 | 3 | 2,52 | C_5540001                              |
| 95  | DILSCIDLIGCHYpQRSVR                               | 2172,41 | 3 | 3,04 | C_6070001                              |
| 96  | <b>TpPETPNWPTpPSpLLPSTPPQLSpASAASLR n</b>         | 2944,23 | 3 | 2,89 | C_10520001                             |
| 97  | LGAVNVSVRSVRAGGGS AVPSLSpQR n                     | 2505,71 | 3 | 2,92 | C_10920001                             |
| 98  | FETKPSpLVVIFESLINSYDGNSDISpGR n                   | 3149,24 | 3 | 2,74 | C_18720001                             |
| 99  | PSTVSRGARGAGGGGGAAPGSpR                           | 1963,99 | 2 | 2,24 | C_19430001                             |
| 100 | <b>SpHSAGAASpLAAATpASAINQSR n</b>                 | 1987,05 | 2 | 2,19 | C_21830001                             |
| 101 | <b>AQQLLVSpAVTSFELSR n</b>                        | 1831,12 | 2 | 2,15 | C_23720001                             |
| 102 | <b>GASLSGVYANGDGAGTSAAGGGGRLGASpAGTSpR n</b>      | 2944,98 | 3 | 3,09 | C_32510001                             |
| 103 | MLSALGLPDLSSASpAIFRSNAPQPRITR n                   | 3051,41 | 3 | 3,04 | AV387966; 179.3.1.91                   |
| 104 | LLSpAKLCFTPI SFKREYPDAPDGTVI n                    | 2963,33 | 3 | 2,67 | AV391807                               |
| 105 | LDCRLGLQSpLAGNLSQLPWAQPQGP                        | 3094,43 | 3 | 3,56 | AV396325; 8.52.1.51                    |
| 106 | PPQFRRSLPHLPTpPGHPFLSpHPPSMR                      | 3148,43 | 3 | 2,99 | AV396603, 80.32.1.5                    |
| 107 | DAGSpCIFLCIRAGACLNSPK n                           | 2235,49 | 3 | 2,98 | AV619068 ; 128.29.1.51                 |
| 108 | <b>VVEPEVSpEEPPSpPK</b>                           | 1813,89 | 3 | 3,98 | AV619529; 20021010.665.1,<br>90.6.2.11 |
| 109 | PKVYpSpECLQSRLVLALVSSpASpSAGTR n                  | 3044,05 | 3 | 4,15 | AV626527; 38.88.1.51                   |
|     | PKVYpSECLQSRLVLALVSpSASpSAGTR n                   | 2964,07 | 3 | 3,47 |                                        |
| 110 | HAVSpELFSPSYpTLESpYPTpEADSpL n                    | 2944,61 | 3 | 2,70 | AV627521                               |
| 111 | GASpLAGKPRHTPR                                    | 1428,52 | 2 | 2,32 | AV631541 ; 187.9.1.5,                  |
| 112 | LLVRPPAPPTPSpACLDAR n                             | 2127,39 | 2 | 2,45 | AV635896; 79.47.1.0,                   |
| 113 | ASpAPKTpLAHSpRLTPYpK                              | 2061,94 | 2 | 2,55 | AV640199; 93.24.1.5                    |
| 114 | YpILLSDDCFANMTTLPIAINQNTpTI n                     | 2947,16 | 3 | 2,87 | AV640777; 435.2.1.5                    |
| 115 | SpWIECSVSpEEIASWLQCHYFKA                          | 3095,31 | 3 | 2,72 | AV641655; 42.28.1.5                    |
| 116 | CRQSARTpVAGMLPRTVAVLTAALTP                        | 2962,47 | 2 | 2,10 | AV643276, 60.45.1.5                    |
| 117 | YpLAATINRAADSpAAGSpLAGKSQK n                      | 2505,45 | 3 | 2,73 | 1030009D08.y1, 163.5.1.0               |
| 118 | SPPPPPSpPAATpATAATSSpPPPTpSpAMPPTPR n             | 2945,13 | 3 | 3,17 | 1030118A09.y1; 30.16.2.51              |
| 119 | <b>TpSpVEFELHTpDTpVVLKRLEFTpHLNK</b>              | 2866,22 | 3 | 3,56 | 106.29.1.5                             |
| 120 | KLPALSpNTpAPPEPQAESpPTSRLHLGAK n                  | 3052,11 | 3 | 2,57 | 1115015F03.x1                          |

|     |                                                     |         |   |      |                                                    |
|-----|-----------------------------------------------------|---------|---|------|----------------------------------------------------|
| 121 | SLSMWVGYRGLSpKGLTpASYAAALSAFR                       | 3025,26 | 3 | 3,04 | 144.3.1.0, 20021010.2585.1,<br>1031080H11.y1       |
| 122 | QKRHATTpLPLQK                                       | 1501,65 | 2 | 2,44 | 20021010.1082.1,<br>20021010.1240.1,<br>131.2.2.11 |
| 123 | <b>NLVTpPHTpHVVKTpSpR</b>                           | 1811,76 | 2 | 2,34 | 20021010.3311.1                                    |
| 124 | <b>QCLGNNApETpSpSQLVR</b>                           | 1653,85 | 2 | 2,61 | 20021010.5201.1                                    |
| 125 | RGLSpLSpLTAASpSpAGSpRGAR                            | 2218,92 | 3 | 2,77 | 20021010.5711.2,<br>133.10.2.51,<br>1112112E07.y1  |
| 126 | <b>KLNFTpTpKTpTYINNK n</b>                          | 1828,89 | 2 | 2,08 | 20021010.6005.2                                    |
| 127 | <b>LTGGWAVRLTpVGAGGAPQLPRTQVATpTpGSR n</b>          | 2926,38 | 3 | 2,51 | 20021010.713.1                                     |
| 128 | VPTpDRLPpSpSSPDYpGDLHMR                             | 2384,29 | 3 | 2,69 | 20021010.7141.1,<br>894066C01.x1                   |
| 129 | APVHNPPRETpSLAANTLLSAHAR n                          | 2504,68 | 2 | 2,03 | 20021010.7912.2                                    |
| 130 | LTPpTPpGSpTpSVACTpSTTVTPFHASpLNVR n                 | 3129,84 | 2 | 2,35 | 20021010.9158.1,                                   |
| 131 | <b>RTMTpCIAEPVTTSAQVAPSpAATpASpASpAPR</b>           | 3052,15 | 3 | 2,61 | 20021010.9406.1                                    |
| 132 | <b>VRMTpASTpSTpSTPPATAAPAAGSGPKP n</b>              | 2359,69 | 3 | 2,83 | 220.7.1.5                                          |
| 133 | <b>GATpGRNALGSSNTpTQSTpHEPTpRTSpLHVR n</b>          | 2946,10 | 3 | 3,20 | 224.5.1.5                                          |
| 134 | GYSpVNSVLVHLEADPRSATGSSEQSTDR                       | 3044,09 | 3 | 3,06 | 2815.1.1.5, 894005F08.y1,<br>AV640439              |
| 135 | <b>GLSADPSpCPSpASpGAAGHGSpAVATpSSASPTpVTpPITGEK</b> | 3398,53 | 3 | 3,78 | 29.72.1.5                                          |
| 136 | QTpSpKNPTpNTpVPQTKMNTGSpQAAPHR                      | 3095,85 | 3 | 2,77 | 49.25.8.32                                         |
| 137 | AVLMEATTNYATTPVVETpQLLKSpAACR                       | 3043,29 | 3 | 2,72 | 67.38.1.5                                          |
| 138 | <b>AVDSPPGPLDSpIATKpIEDLDTDYCDDFVCTSSPAVEQTVR n</b> | 4435,71 | 3 | 4,51 | 96.45.1.51                                         |
| 139 | <b>LGTpNRNPHKSEPPAPSpNATpAPK n</b>                  | 2329,49 | 3 | 2,63 | 963009B02.y9                                       |
| 140 | <b>PTETpPEPRSAETpKTPPK</b>                          | 1813,91 | 3 | 2,64 | 963009D06.x9                                       |
| 141 | YINIITSYHILYpYpK                                    | 1965,07 | 2 | 2,91 | 963032D06.x1                                       |
| 142 | <b>SpSpTpGLVPRMTPVAVRSpTpLALQSTpMR</b>              | 2927,06 | 3 | 3,57 | 98.2.5.51                                          |
|     | <b>SpSpTpGLVPRMTPVAVRSpTpLALQSTpMR</b>              | 2847,08 | 3 | 3,46 |                                                    |

---

Theor. mass, theoretical mass of the peptide ion [MH<sup>+</sup>]; z, charge; Tp, phosphorylated Thr or Methyldehydroalanine; Sp, phosphorylated Ser or Dehydroalanine; Yp, phosphorylated Tyr; n, the exact phosphorylation site(s) within the peptide cannot be specified with certainty; **bold writing**, the phosphopeptide was identified by MS/MS and in addition by MS/MS/MS spectra; ***bold and in parallel italics writing***, the peptide was solely identified by MS/MS/MS spectra.

---
